# Supplementary material
Source: Research Square preprint supplement (doi:10.21203/rs.3.rs-8740276/v1)
Supplement: Supplementary file 1 [file 3b4a595a99af211b45fa7432.xlsx]

## Sheet: Supplementary Table 1
Supplementary Table 1. Partial fertility after self-pollination in alfalfa cultivars.
Lines	Branches	Inflorescences	Flowers	Pods	Flowers/Inflorescences Mean±SD	Pods/Inflorescences Mean±SD	Pod-set rate (%) Mean±SD
Zm-1	5	61	1402	58	22.98±1.73	0.95±1.18	4%±5%
Af-5	3	36	783	2	21.5±1.05	0.05±0.23	0.26%±1.1%
Af-3	3	33	692	0	20.96±1.15	0±0	0±0
Sudan-1	4	45	677	5	15.04±1.02	0.31±0.11	0.76%±2.2%
Sudan-2	4	44	646	2	14.68±0.67	0.21±0.05	0.3%±1.4%
Sudan-5	5	52	773	3	14.86±0.84	0.23±0.06	0.38%±1.54%

## Sheet: Supplementary Table 2
Supplementary Table 2. Summary of the genome assembly features of M. sativa Zm-1.
	Genome	Haplotype1	Haplotype2	Haplotype3	Haplotype4
Size (Mb)	3364.81	809.86	772.76	751.65	724.59
Contig number	6838	859	943	836	724
Contig N50 (Mb)	4.53	4.67	4.79	5.08	4.69
BUSCO (%)	100	98.9	99.4	99.3	96.4
Gene number	143478	35081	35249	35125	33722

## Sheet: Supplementary Table 3
Supplementary Table 3. Gene IDs of the 43 candidate clusters.
ID	Chr	Start	End	Geneid	Type	Subcellular location
1	Chr1.1	6127309	6130194	MsZm1C1H1G001830	Pollen	GLOB
1	Chr1.1	6194558	6195777	MsZm1C1H1G001900	Pollen	GLOB
1	Chr1.1	6275677	6283420	MsZm1C1H1G001980	Style	SP
2	Chr1.1	63645604	63646497	MsZm1C1H1G023980	Pollen	GLOB
2	Chr1.1	63815046	63821485	MsZm1C1H1G024020	Style	SP
3	Chr1.1	76280740	76282455	MsZm1C1H1G031540	Style	SP
3	Chr1.1	76370042	76370446	MsZm1C1H1G031610	Pollen	GLOB
3	Chr1.1	76432886	76434022	MsZm1C1H1G031680	Pollen	GLOB
4	Chr1.1	97772068	97772316	MsZm1C1H1G047610	Pollen	GLOB
4	Chr1.1	97880904	97882364	MsZm1C1H1G047680	Style	SP
5	Chr2.1	6704068	6706630	MsZm1C2H1G005120	Style	SP
5	Chr2.1	6758031	6761811	MsZm1C2H1G005180	Pollen	SP+TM|SP+TM|SP+TM
5	Chr2.1	6883390	6888398	MsZm1C2H1G005300	Style	SP+TM|SP
5	Chr2.1	6939721	6940322	MsZm1C2H1G005320	Pollen	GLOB
5	Chr2.1	7082029	7082337	MsZm1C2H1G005470	Style	SP
6	Chr2.1	11934884	11937801	MsZm1C2H1G008770	Style	SP
6	Chr2.1	11949106	11950215	MsZm1C2H1G008780	Pollen	GLOB
7	Chr2.1	13598377	13603041	MsZm1C2H1G009930	Style	SP
7	Chr2.1	13711080	13711259	MsZm1C2H1G010000	Pollen	TM
8	Chr2.1	22279009	22279593	MsZm1C2H1G014880	Style	SP
8	Chr2.1	22406177	22410593	MsZm1C2H1G014970	Pollen	TM
9	Chr2.1	54595621	54596440	MsZm1C2H1G024090	Style	SP
9	Chr2.1	54627176	54627619	MsZm1C2H1G024110	Pollen	GLOB
9	Chr2.1	54726226	54738435	MsZm1C2H1G024140	Pollen	GLOB|GLOB
10	Chr2.1	78048153	78048808	MsZm1C2H1G036910	Style	SP
10	Chr2.1	78200240	78201563	MsZm1C2H1G037010	Pollen	TM
11	Chr2.1	80780174	80782436	MsZm1C2H1G038950	Pollen	TM
11	Chr2.1	80981820	80983319	MsZm1C2H1G039150	Style	SP
12	Chr3.1	2403643	2408481	MsZm1C3H1G000350	Style	SP
12	Chr3.1	2534098	2535039	MsZm1C3H1G000440	Pollen	SP|GLOB
13	Chr3.1	23328233	23329330	MsZm1C3H1G008180	Pollen	GLOB
13	Chr3.1	23342820	23343944	MsZm1C3H1G008190	Pollen	GLOB
13	Chr3.1	23359059	23360213	MsZm1C3H1G008200	Pollen	GLOB
13	Chr3.1	23368863	23369951	MsZm1C3H1G008210	Pollen	GLOB
13	Chr3.1	23410081	23411154	MsZm1C3H1G008220	Pollen	GLOB
13	Chr3.1	23419094	23420248	MsZm1C3H1G008230	Pollen	GLOB
13	Chr3.1	23531466	23532417	MsZm1C3H1G008320	Style	SP
14	Chr3.1	65138810	65139392	MsZm1C3H1G019210	Style	SP
14	Chr3.1	65212421	65213004	MsZm1C3H1G019260	Style	SP
14	Chr3.1	65253826	65254245	MsZm1C3H1G019280	Pollen	TM
14	Chr3.1	65256106	65256351	MsZm1C3H1G019290	Pollen	TM
15	Chr3.1	78139949	78142121	MsZm1C3H1G026400	Pollen	TM
15	Chr3.1	78359300	78365468	MsZm1C3H1G026550	Pollen	GLOB|GLOB|GLOB
15	Chr3.1	78488244	78489158	MsZm1C3H1G026620	Style	SP
16	Chr3.1	79124513	79126729	MsZm1C3H1G027010	Style	SP
16	Chr3.1	79131871	79132702	MsZm1C3H1G027030	Pollen	GLOB
17	Chr3.1	86368358	86373013	MsZm1C3H1G032220	Style	SP
17	Chr3.1	86480019	86480648	MsZm1C3H1G032300	Pollen	GLOB
18	Chr3.1	91725937	91726236	MsZm1C3H1G036630	Style	SP
18	Chr3.1	91827948	91831639	MsZm1C3H1G036730	Pollen	TM
19	Chr3.1	99854470	99857432	MsZm1C3H1G042770	Pollen	GLOB
19	Chr3.1	99981745	99985504	MsZm1C3H1G042900	Style	SP
20	Chr3.1	102367811	102371710	MsZm1C3H1G044950	Style	SP
20	Chr3.1	102502161	102503086	MsZm1C3H1G045020	Pollen	GLOB
21	Chr4.1	33542393	33543037	MsZm1C4H1G009560	Style	SP
21	Chr4.1	33597024	33597668	MsZm1C4H1G009570	Style	SP
21	Chr4.1	33654251	33654604	MsZm1C4H1G009620	Style	SP
21	Chr4.1	33670950	33671396	MsZm1C4H1G009630	Pollen	GLOB
22	Chr4.1	41266395	41267412	MsZm1C4H1G012320	Style	SP
22	Chr4.1	41354588	41357243	MsZm1C4H1G012350	Pollen	GLOB
23	Chr4.1	45606626	45609452	MsZm1C4H1G013610	Style	SP
23	Chr4.1	45610514	45612268	MsZm1C4H1G013620	Pollen	TM
24	Chr4.1	77253128	77254387	MsZm1C4H1G021340	Pollen	GLOB
24	Chr4.1	77346063	77346629	MsZm1C4H1G021390	Style	SP
24	Chr4.1	77378938	77379501	MsZm1C4H1G021410	Style	SP
25	Chr4.1	87797835	87799359	MsZm1C4H1G028920	Pollen	GLOB
25	Chr4.1	87884703	87888894	MsZm1C4H1G028980	Pollen	GLOB
25	Chr4.1	87895588	87897483	MsZm1C4H1G028990	Style	SP
26	Chr4.1	94375333	94379635	MsZm1C4H1G034000	Pollen	GLOB
26	Chr4.1	94412942	94413328	MsZm1C4H1G034060	Style	SP
26	Chr4.1	94481338	94481895	MsZm1C4H1G034150	Style	SP
26	Chr4.1	94507691	94512812	MsZm1C4H1G034190	Pollen	TM
27	Chr4.1	95334355	95336469	MsZm1C4H1G034920	Pollen	GLOB
27	Chr4.1	95514975	95516000	MsZm1C4H1G035050	Style	SP
28	Chr4.1	104127421	104130562	MsZm1C4H1G041740	Pollen	GLOB
28	Chr4.1	104192503	104195377	MsZm1C4H1G041810	Style	SP
28	Chr4.1	104196620	104197978	MsZm1C4H1G041820	Style	SP
29	Chr5.1	1419972	1421395	MsZm1C5H1G001090	Style	SP
29	Chr5.1	1505881	1507924	MsZm1C5H1G001140	Pollen	GLOB|GLOB
30	Chr5.1	3963990	3964718	MsZm1C5H1G003040	Style	SP
30	Chr5.1	3997032	3997472	MsZm1C5H1G003080	Pollen	GLOB
31	Chr5.1	12932381	12932590	MsZm1C5H1G009030	Pollen	GLOB
31	Chr5.1	12965076	12965562	MsZm1C5H1G009050	Style	SP
32	Chr5.1	66009892	66010669	MsZm1C5H1G028990	Style	SP
32	Chr5.1	66160719	66164793	MsZm1C5H1G029110	Pollen	GLOB
32	Chr5.1	66185915	66188904	MsZm1C5H1G029130	Pollen	GLOB
33	Chr6.1	6727365	6729001	MsZm1C6H1G002880	Pollen	GLOB
33	Chr6.1	6833952	6834587	MsZm1C6H1G002960	Style	SP
34	Chr6.1	102109468	102111435	MsZm1C6H1G029210	Pollen	GLOB
34	Chr6.1	102147497	102149280	MsZm1C6H1G029270	Style	SP
34	Chr6.1	102329802	102330407	MsZm1C6H1G029410	Pollen	TM
35	Chr7.1	82146108	82148557	MsZm1C7H1G024090	Style	SP
35	Chr7.1	82285229	82285546	MsZm1C7H1G024150	Pollen	GLOB
36	Chr7.1	88375403	88380146	MsZm1C7H1G028640	Style	SP
36	Chr7.1	88486047	88504004	MsZm1C7H1G028780	Pollen	TM
37	Chr7.1	92560074	92561116	MsZm1C7H1G031510	Style	SP
37	Chr7.1	92676340	92679274	MsZm1C7H1G031610	Pollen	GLOB|GLOB
37	Chr7.1	92832762	92833346	MsZm1C7H1G031720	Style	SP
38	Chr8.1	6008869	6009602	MsZm1C8H1G001090	Pollen	TM
38	Chr8.1	6167644	6171448	MsZm1C8H1G001230	Style	SP
39	Chr8.1	11875887	11877514	MsZm1C8H1G004970	Style	SP
39	Chr8.1	12042467	12043910	MsZm1C8H1G005080	Pollen	GLOB
40	Chr8.1	77327187	77331744	MsZm1C8H1G031930	Pollen	TM|TM
40	Chr8.1	77442528	77443973	MsZm1C8H1G032050	Style	SP
41	Chr8.1	77534464	77534862	MsZm1C8H1G032150	Style	SP
41	Chr8.1	77566007	77566411	MsZm1C8H1G032180	Style	SP
41	Chr8.1	77568872	77569381	MsZm1C8H1G032190	Style	SP
41	Chr8.1	77717099	77719484	MsZm1C8H1G032240	Pollen	GLOB
42	Chr8.1	90490130	90491973	MsZm1C8H1G041580	Pollen	GLOB
42	Chr8.1	90641003	90641782	MsZm1C8H1G041710	Style	SP
42	Chr8.1	90803452	90804027	MsZm1C8H1G041820	Pollen	SP|GLOB
42	Chr8.1	90860278	90860811	MsZm1C8H1G041890	Style	SP
42	Chr8.1	91029764	91031645	MsZm1C8H1G042020	Pollen	GLOB
43	Chr8.1	93489693	93490054	MsZm1C8H1G043980	Pollen	GLOB
43	Chr8.1	93597091	93598445	MsZm1C8H1G044040	Style	SP
43	Chr8.1	93633366	93633629	MsZm1C8H1G044070	Style	SP

## Sheet: Supplementary Table 4
Supplementary Table 4. Homologous sequences of the S genes in alfalfa identified in other legume species.
Species	Gene	Chromosome	Start	End
Medicago sativa ssp. caerulea	S-DUF295	Chr3	34815574	34816694
Medicago sativa ssp. caerulea	S-DUF295	Chr3	34927196	34928271
Medicago sativa ssp. caerulea	S-DUF295	Chr3	34962261	34963417
Medicago sativa ssp. caerulea	S-DUF295	Chr3	34969324	34970417
Medicago sativa ssp. caerulea	FIRS-RNase	Chr3	35074294	35075215
Medicago sativa ssp. caerulea	FIRS-RNase	Chr3	35317953	35319004
Medicago sativa ssp. falcata	S-DUF295	Chr3.1	25052643	25053762
Medicago sativa ssp. falcata	S-DUF295	Chr3.1	25157855	25159010
Medicago sativa ssp. falcata	S-DUF295	Chr3.1	25188972	25190057
Medicago sativa ssp. falcata	S-DUF295	Chr3.1	25230459	25231614
Medicago sativa ssp. falcata	S-DUF295	Chr3.1	25285551	25286631
Medicago sativa ssp. falcata	S-DUF295	Chr3.1	25293964	25295028
Medicago sativa ssp. falcata	S-DUF295	Chr3.2	24575662	24576781
Medicago sativa ssp. falcata	S-DUF295	Chr3.2	24638962	24640081
Medicago sativa ssp. falcata	S-DUF295	Chr3.2	24753667	24754822
Medicago sativa ssp. falcata	S-DUF295	Chr3.2	24764560	24765655
Medicago sativa ssp. falcata	S-DUF295	Chr3.2	24771770	24772855
Medicago sativa ssp. falcata	S-DUF295	Chr3.3	25421570	25422689
Medicago sativa ssp. falcata	S-DUF295	Chr3.3	25482976	25484131
Medicago sativa ssp. falcata	S-DUF295	Chr3.3	25491663	25492749
Medicago sativa ssp. falcata	S-DUF295	Chr3.3	25498982	25500067
Medicago sativa ssp. falcata	FIRS-RNase	Chr3.3	25617039	25617999
Medicago sativa ssp. falcata	S-DUF295	Chr3.4	24120547	24121666
Medicago sativa ssp. falcata	S-DUF295	Chr3.4	24237833	24238988
Medicago sativa ssp. falcata	S-DUF295	Chr3.4	24241848	24242952
Medicago sativa ssp. falcata	S-DUF295	Chr3.4	24249206	24250291
Medicago sativa ssp. falcata	S-DUF295	Chr3.4	24265221	24266293
Medicago sativa ssp. falcata	S-DUF295	Chr3.4	24338497	24339652
Medicago sativa ssp. falcata	S-DUF295	Chr3.4	24349580	24350666
Medicago sativa ssp. falcata	FIRS-RNase	Chr3.4	24576382	24577332
Medicago truncatula	S-DUF295	MtrunA17Chr3	10148899	10150020
Medicago truncatula	S-DUF295	MtrunA17Chr3	10157952	10159032
Medicago truncatula	S-DUF295	MtrunA17Chr3	10186834	10187905
Medicago truncatula	FIRS-RNase	MtrunA17Chr3	10244586	10245507
Medicago truncatula	FIRS-RNase	MtrunA17Chr3	10263927	10264864
Medicago polymorpha	FIRS-RNase	GWHANWO00000005.1	36795363	36796301
Medicago arabica	S-DUF295	OX326967.1	8981350	8982469
Medicago arabica	S-DUF295	OX326967.1	9007433	9008513
Medicago lupulina	S-DUF295	OY283144.1	58497470	58498589
Medicago ruthenica	FIRS-RNase	CM031372.1	103364454	103365301
Melilotus officinalis	S-DUF295	Chr03	27169046	27170056
Melilotus officinalis	S-DUF295	Chr03	30187091	30188029
Melilotus officinalis	FIRS-RNase	Chr02	133034879	133035728
Trigonella corniculata	S-DUF295	CM103884.1	60219759	60220851
Trigonella corniculata	S-DUF295	CM103880.1	98737038	98737980
Trigonella corniculata	FIRS-RNase	CM103878.1	68816782	68817693
Trifolium dubium	FIRS-RNase	OX638064.1	47337603	47337996
Trifolium dubium	FIRS-RNase	OX638074.1	25575602	25576002
Trifolium subterraneum	S-DUF295	OX637466.1	51707887	51709021
Trifolium subterraneum	FIRS-RNase	OX637467.1	44585463	44591086
Trifolium alexandrinum	FIRS-RNase	BAAFRB010000004.1	7843667	7844527
Trifolium striatum	S-DUF295	OZ060914.1	3158679	3159757
Trifolium striatum	FIRS-RNase	OZ060919.1	8206434	8207361
Trifolium pratense	S-DUF295	LT990603.1	21846852	21847925
Trifolium pratense	FIRS-RNase	LT990604.1	8371867	8372838
Trifolium fragiferum	S-DUF295	OX940794.1	3807830	3806756
Trifolium occidentale	S-DUF295	OZ060770.1	52987440	52988564
Trifolium repens	S-DUF295	CP125840.1	56845374	56846501
Trifolium repens	FIRS-RNase	CP125843.1	8829435	8829723
Oxytropis ochrocephala	FIRS-RNase	CM037092.1	47469196	47470099
Oxytropis ochrocephala	FIRS-RNase	CM037092.1	47379564	47380462
Astragalus membranaceus	FIRS-RNase	CM091375.1	82764251	82765137

## Sheet: Supplementary Table 5
Supplementary Table 5. Partial fertility after close-pollination in alfalfa transgenic lines.
Fertility	Lines	Branches	Inflorescences	Flowers	Pods	Flowers/Inflorescences Mean±SD	Pods/Inflorescences Mean±SD	Pod-set rate (%) Mean±SD	Bar
low*	WT	5	44	1193	99	26.51±1.56	2.2±1.65	7.89%±5.53%	-
	CK2	5	54	1100	5	20.37±1.15	0.09±0.29	0%±1%	-
	CK5	5	49	1076	5	21.96±2.61	0.10±0.31	0.49%±1.47%	-
	CK8	4	29	623	12	21.48±1.38	0.41±0.68	1.88%±0.87%	-
	CK7	4	26	486	18	18.69±1.38	0.69±0.93	3.79%±4.96%	-
	CK3	5	53	1523	66	28.74±2.50	1.25±1.24	4.18%±4.01%	-
	CK4	5	47	1100	67	23.40±1.50	1.43±1.14	6.07%±4.75%	-
	CK6	3	29	647	51	22.31±8.00	1.76±1.43	9.21%±7.81%	-
low*	Ri-35	4	22	449	0	20.43±1.26	0.0±0.0	0.0%±0.0%	+
	Ri-20	5	45	1116	9	24.8±1.12	0.2±0.46	0.80%±1.82%	+
	Ri-10	5	62	1180	15	19.03±1.31	0.24±0.5	1%±3%	+
	Ri-11	5	60	1206	12	20.10±1.39	0.2±0.48	1%±2%	+
	Ri-12	5	65	1309	15	20.14±1.14	0.23±0.55	1%±3%	+
	Ri-13	5	64	1711	26	26.73±2.12	0.41±0.66	1%±2%	+
	Ri-23	4	37	756	8	20.43±1.85	0.22±0.42	1.08%±2.09%	+
	Ri-28	5	38	758	26	19.95±1.32	0.68±0.92	3.34%±4.44%	+
	Ri-33	4	30	642	22	21.4±1.54	0.73±0.87	3.43%±3.97%	+
	Ri-34	4	35	745	29	21.29±1.66	0.83±0.86	3.97%±4.18%	+
	Ri-8	5	62	1354	50	21.84±1.97	0.81±0.96	4%±4%	+
	Ri-5	5	74	1556	64	21.03±1.61	0.86±1.09	4%±5%	+
	Ri-31	4	26	397	16	15.27±1.19	1.62±0.80	4.05%±5.31%	+
	Ri-30	3	21	435	21	20.71±1.42	1.0±0.89	4.77%±4.33%	+
	Ri-25	4	12	301	17	25.08±0.79	1.42±1.78	5.55%±7.0%	+
	Ri-38	4	30	565	36	18.83±1.53	1.2±0.76	6.47%±4.2%	+
	Ri-36	5	35	761	50	21.74±1.79	1.43±1.27	6.65%±5.90%	+
	Ri-27	3	50	612	50	21.10±1.45	1.72±1.03	7.96%±1.63%	+
	Ri-32	4	34	708	60	20.82±1.70	1.76±1.35	8.36%±6.26%	+
	Ri-1	5	61	1808	173	29.64±1.85	2.84±2.13	9.46%±6.82%	+
moderate**	Ri-24	4	24	345	38	14.38±1.01	1.58±0.93	11.19%±6.94%	+
	Ri-2	6	60	1295	155	21.58±1.73	2.58±2.35	11.56%±10.35%	+
	Ri-37	4	25	587	73	23.48±1.50	2.92±1.75	12.46%±7.55%	+
	Ri-3	5	69	1529	212	22.16±1.66	3.07±1.94	14%±8%	+
	Ri-4	5	49	1101	162	22.47±1.7	3.31±1.93	15%±8%	+
	Ri-29	5	34	466	72	15.53±0.86	2.4±1.48	15.45%±9.29%	+
	Ri-22	4	27	522	82	19.33±1.33	3.03±1.56	15.82%±8.30%	+
	Ri-21	5	42	931	150	22.17±2.38	3.57±1.53	16.25%±6.88%	+
	Ri-26	4	20	294	52	14.7±0.73	2.6±1.39	17.68%±9.59%	+
	Ri-18	3	18	326	61	18.11±1.02	3.39±2.45	18.46%±12.83%	+
	Ri-16	4	38	752	144	19.79±0.91	3.79±1.58	19.3%±8.15%	+
high***	Ri-19	5	32	776	159	24.25±1.34	4.97±1.86	20.67%±8.12%	+
	Ri-14	5	61	1345	288	22.05±2.57	4.72±1.94	21%±8%	+
	Ri-17	3	15	306	66	20.4±1.64	4.4±2.13	21.43%±10.04%	+
	Ri-6	5	55	1364	366	24.8±1.47	6.65±3.07	27%±12%	+
	Ri-7	5	45	1085	244	24.11±1.37	5.42±1.83	22%±7%	+

## Sheet: Supplementary Table 6
Supplementary Table 6. Target genes of the S- and AS-ODNs.
ASON	Target gene	Geneid	Pollen (TPM)
MsS3b-DUF295	MsS4e-DUF295	MsZm1C3H4G008250.mRNA1	0.069209
MsS3b-DUF295	MsS3b-DUF295	MsZm1C3H3G008050.mRNA1	0.160457
MsS3b-DUF295	MsS2e-DUF295	MsZm1C3H2G008240.mRNA1	4.41958
MsS3b-DUF295		MsZm1C3H1G008260.mRNA1	0.00425519
MsS3b-DUF295	MsS1h-DUF295	MsZm1C3H1G008220.mRNA1	5.78853
MsS3b-DUF295	MsS1e-DUF295	MsZm1C3H1G008190.mRNA1	2.03414
MsS3d-DUF295	MsS4f-DUF295	MsZm1C3H4G008260.mRNA1	10.382
MsS3d-DUF295	MsS4c-DUF295	MsZm1C3H4G008240.mRNA1	1.8713
MsS3d-DUF295	MsS3d-DUF295	MsZm1C3H3G008070.mRNA1	4.09648
MsS3d-DUF295		MsZm1C3H2G007961.mRNA1	0.124279
MsS3d-DUF295	MsS1f-DUF295	MsZm1C3H1G008200.mRNA1	3.39263
MsS1f-DUF295	MsS4c-DUF295	MsZm1C3H4G008240.mRNA1	1.8713
MsS1f-DUF295	MsS3d-DUF295	MsZm1C3H3G008070.mRNA1	4.09648
MsS1f-DUF295	MsS1f-DUF295	MsZm1C3H1G008200.mRNA1	3.39263
MsS1f-DUF295	MsS1c-DUF295	MsZm1C3H1G008170.mRNA1	4.20863

## Sheet: Supplementary Table 7
Supplementary Table 7. Gene composition and expression of Type 1-like S-loci in M. sativa Zm-1.
ID	Gene	Domain	Chromosome	Start	End	Leaf	Pistil	Pollen
1	MsZm1C1H1G046770	T2	Chr1.1	96769430	96769997	0	0.0204147	0
	MsZm1C1H1G047540	FBA	Chr1.1	97704151	97705308	0	0.226754	0
	MsZm1C1H1G047850	FBD	Chr1.1	98097558	98100241	0.749637	1.61413	0.0096941
2	MsZm1C1H2G046320	T2	Chr1.2	87776158	87776773	0	0.0255178	0
	MsZm1C1H2G047420	FBD	Chr1.2	89013016	89015689	0.60378	1.46301	0.0298855
3	MsZm1C2H1G038440	FBK	Chr2.1	80005882	80006976	0.613254	4.23966	0.27348
	MsZm1C2H1G038600	FBD	Chr2.1	80344706	80345906	0	0.00468058	0
	MsZm1C2H1G039370	T2	Chr2.1	81229436	81230428	0	0	0
4	MsZm1C2H2G006870	FBD	Chr2.2	9429642	9431052	0	0	0
	MsZm1C2H2G007310	FBA	Chr2.2	10018042	10019157	0	0.057325	0.314804
	MsZm1C2H2G007330	FBA	Chr2.2	10048191	10049431	2.47921	4.39864	0.0456755
	MsZm1C2H2G007340	FBA	Chr2.2	10057915	10059198	1.29372	3.64874	0.0307514
	MsZm1C2H2G007370	FBA	Chr2.2	10071690	10072820	0.398063	2.1176	0.0845391
	MsZm1C2H2G007700	T2	Chr2.2	10419118	10425552	0	0.254263	0
	MsZm1C2H2G007780	T2	Chr2.2	10666558	10667289	0	0	0
5	MsZm1C2H2G028870	FBK	Chr2.2	67181797	67182939	0	0	0
	MsZm1C2H2G029780	T2	Chr2.2	68885923	68887886	0.00477647	0	0
	MsZm1C2H2G030180	FBD	Chr2.2	69555053	69556804	1.10423	1.6792	0.0117729
6	MsZm1C2H3G029050	FBK	Chr2.3	68856947	68858089	0	0	0.0677467
	MsZm1C2H3G029940	T2	Chr2.3	70530079	70532042	0.00477647	0	0
7	MsZm1C2H3G039320	FBK	Chr2.3	84097273	84098367	1.09893	4.1994	0.155395
	MsZm1C2H3G039480	FBD	Chr2.3	84385165	84386459	0	0	0.00487684
	MsZm1C2H3G039490	FBD	Chr2.3	84402591	84403881	0	0	0
	MsZm1C2H3G039510	FBD	Chr2.3	84433164	84434364	0.0598467	0.101663	0
	MsZm1C2H3G040290	T2	Chr2.3	85483821	85484042	0	0	0
	MsZm1C2H3G040320	T2	Chr2.3	85564062	85564361	0	0	0
8	MsZm1C2H4G038610	FBK	Chr2.4	79777733	79778827	0.515267	4.08613	0.424776
	MsZm1C2H4G038790	FBD	Chr2.4	80143244	80144444	0.0143294	0.0483035	0
	MsZm1C2H4G039630	T2	Chr2.4	81307931	81308842	0	0.00814203	0
	MsZm1C2H4G039640	T2	Chr2.4	81322875	81323267	0	0	0
9	MsZm1C2H5G028340	FBK	Chr2.5	64687944	64689086	0	0	0.00971954
	MsZm1C2H5G029150	T2	Chr2.5	66142309	66145887	0.00383622	0	0.00217602
	MsZm1C2H5G029560	FBD	Chr2.5	66797570	66799321	1.22202	1.42094	0.0131597
10	MsZm1C2H5G038860	FBD	Chr2.5	80650663	80651863	0.0445057	0.0483035	0
	MsZm1C2H5G040000	T2	Chr2.5	82399300	82399692	0	0	0
11	MsZm1C3H2G008092	FBA	Chr3.2	23367196	23368098	0	0	0
	MsZm1C3H2G008320	T2	Chr3.2	24017261	24018226	0	0.00882828	0
12	MsZm1C3H3G007950	FBD	Chr3.3	26119388	26120694	0.218879	0.300457	0.153182
	MsZm1C3H3G007980	FBA	Chr3.3	26159073	26159714	0	0	0
	MsZm1C3H3G008130	T2	Chr3.3	26585448	26586369	0	0.00899237	0
	MsZm1C3H3G008140	T2	Chr3.3	26695691	26696721	0	9.54857	0
13	MsZm1C4H1G002960	FBA	Chr4.1	12394649	12395851	1.4265	2.54651	0.0314243
	MsZm1C4H1G003120	FBK	Chr4.1	12853900	12854976	14.2166	10.0568	0.188012
	MsZm1C4H1G003570	FBA	Chr4.1	13384115	13384873	0	0	0
	MsZm1C4H1G004040	T2	Chr4.1	14137940	14138683	0	0.607889	0
14	MsZm1C4H1G017730	FBD	Chr4.1	69997531	69999359	0.367091	0.845289	0
	MsZm1C4H1G017740	FBD	Chr4.1	70006028	70008113	0.0561492	0.685407	0
	MsZm1C4H1G017760	FBD	Chr4.1	70026968	70029131	0.00324145	0.0336761	0.0568116
	MsZm1C4H1G017770	FBD	Chr4.1	70039588	70041718	0	0.0660656	0
	MsZm1C4H1G017780	FBD	Chr4.1	70046268	70048295	0	0	0.0818052
	MsZm1C4H1G017790	FBD	Chr4.1	70056759	70058921	0	0	0.0180231
	MsZm1C4H1G017800	FBD	Chr4.1	70063185	70065080	0	0	0.108502
	MsZm1C4H1G017820	FBD	Chr4.1	70078082	70080196	0.192662	0.365714	0.167472
	MsZm1C4H1G017830	FBD	Chr4.1	70091326	70093541	0.348179	0.958254	0
	MsZm1C4H1G017840	FBD	Chr4.1	70099937	70102275	0.417753	1.43095	0
	MsZm1C4H1G017860	FBD	Chr4.1	70115732	70117891	0.230788	0.715703	0
	MsZm1C4H1G017880	FBD	Chr4.1	70124234	70126229	0.151983	0.617801	0.00290899
	MsZm1C4H1G017890	FBD	Chr4.1	70130718	70133020	0.403458	1.4972	0
	MsZm1C4H1G017900	FBD	Chr4.1	70138075	70140336	0.339207	0.568768	0
	MsZm1C4H1G018540	T2	Chr4.1	71962994	71963748	0	0	0
15	MsZm1C4H2G018500	FBD	Chr4.2	57464193	57466491	0.563868	1.80438	0
	MsZm1C4H2G018510	FBD	Chr4.2	57471482	57473730	0.629293	0.707538	0
	MsZm1C4H2G019150	T2	Chr4.2	59463064	59463818	0	0	0
	MsZm1C4H2G019160	T2	Chr4.2	59484689	59485443	0	0	0
16	MsZm1C4H4G017900	FBD	Chr4.4	50268909	50271021	0	0	0
	MsZm1C4H4G017920	FBD	Chr4.4	50281685	50283512	0.022915	0.326105	0
	MsZm1C4H4G017930	FBD	Chr4.4	50289726	50292007	0.850518	2.60515	0.0234629
	MsZm1C4H4G017940	FBD	Chr4.4	50298679	50301057	0.189403	0.74103	0.0115083
	MsZm1C4H4G017950	FBD	Chr4.4	50320717	50322931	0.183051	0.782008	0.0124507
	MsZm1C4H4G017960	FBD	Chr4.4	50329271	50331685	0.070145	0.476138	0
	MsZm1C4H4G017970	FBD	Chr4.4	50343079	50345262	0.00412009	0.0676464	0
	MsZm1C4H4G017990	FBD	Chr4.4	50357352	50359681	0.909678	3.25102	0
	MsZm1C4H4G018000	FBD	Chr4.4	50386590	50388686	0.120814	0.176372	0
	MsZm1C4H4G018010	FBD	Chr4.4	50396238	50398233	0.179073	0.754829	0.00290899
	MsZm1C4H4G018020	FBD	Chr4.4	50403448	50405746	0.626987	1.58905	0
	MsZm1C4H4G018030	FBD	Chr4.4	50410737	50412985	0.609118	0.659159	0
	MsZm1C4H4G018750	T2	Chr4.4	52270180	52270934	0	0	0
17	MsZm1C5H1G008710	FBA	Chr5.1	12434378	12436435	0.730895	1.75743	0.364197
	MsZm1C5H1G008720	FBA	Chr5.1	12441838	12443915	1.10847	2.30576	0.506498
	MsZm1C5H1G008750	FBA	Chr5.1	12460439	12462619	0.478745	1.14513	0.239113
	MsZm1C5H1G008760	FBA	Chr5.1	12527606	12529612	0	0	0
	MsZm1C5H1G009270	T2	Chr5.1	13148594	13149431	0	0.310351	0
	MsZm1C5H1G009830	FBD	Chr5.1	13936770	13938156	0	0	0
18	MsZm1C5H1G027030	FBD	Chr5.1	61856370	61857706	0	0	0.359556
	MsZm1C5H1G027060	FBD	Chr5.1	61910975	61912269	0	0	0.00932517
	MsZm1C5H1G027070	FBD	Chr5.1	61931209	61932571	0	0	0
	MsZm1C5H1G027090	FBD	Chr5.1	61954370	61955640	0	0	0
	MsZm1C5H1G027100	FBD	Chr5.1	61971949	61973212	0	0	0
	MsZm1C5H1G027530	T2	Chr5.1	63006976	63011257	0.0860224	0.254104	0
19	MsZm1C5H2G027500	FBD	Chr5.2	63190975	63192311	0	0	0.198814
	MsZm1C5H2G027510	FBD	Chr5.2	63228431	63229796	0	0.0103098	0.0224778
	MsZm1C5H2G027520	FBD	Chr5.2	63240698	63241992	0	0	0.112805
	MsZm1C5H2G027540	FBD	Chr5.2	63255373	63256660	0	0	0
	MsZm1C5H2G027930	T2	Chr5.2	64032073	64036360	0.0782272	0.213874	0
	MsZm1C5H2G028570	FBD	Chr5.2	65281623	65282897	0	0	0
20	MsZm1C5H3G002730	FBA	Chr5.3	3554682	3556874	0.0212288	0.00693419	0.0120416
	MsZm1C5H3G002760	FBA	Chr5.3	3626068	3628003	9.99819	11.9617	0.832169
	MsZm1C5H3G002780	FBA	Chr5.3	3713823	3715758	6.65912	9.79843	0.60021
	MsZm1C5H3G002940	FBA	Chr5.3	3901082	3903277	5.57753	10.4175	18.3288
	MsZm1C5H3G004050	T2	Chr5.3	5300905	5304394	0	0	0
21	MsZm1C5H3G008770	FBA	Chr5.3	12481938	12483993	0.539562	1.22154	0.333951
	MsZm1C5H3G008790	FBA	Chr5.3	12494754	12497114	1.46538	3.64598	0.295626
	MsZm1C5H3G008830	FBA	Chr5.3	12567464	12569647	0.193713	0.880211	0.349243
	MsZm1C5H3G008840	FBA	Chr5.3	12593291	12595282	0	0	0
	MsZm1C5H3G009320	T2	Chr5.3	13240084	13240933	0	0.0316654	0
	MsZm1C5H3G009360	FBA	Chr5.3	13301193	13303147	0	0	0
	MsZm1C5H3G009870	FBD	Chr5.3	14140500	14141886	0	0	0
22	MsZm1C5H3G027010	FBD	Chr5.3	59986175	59987537	0	0.00811937	0
	MsZm1C5H3G027020	FBD	Chr5.3	60021949	60023343	0	0	0
	MsZm1C5H3G027040	FBD	Chr5.3	60112326	60113691	0	0	0
	MsZm1C5H3G027060	FBD	Chr5.3	60174326	60175607	0	0	0
	MsZm1C5H3G027070	FBD	Chr5.3	60202634	60203904	0	0	0
	MsZm1C5H3G027500	T2	Chr5.3	61039241	61043522	0.0782272	0.177345	0
23	MsZm1C5H4G027640	FBD	Chr5.4	56735847	56737193	0	0	0
	MsZm1C5H4G027670	FBD	Chr5.4	57520241	57521535	0	0	0.05267
	MsZm1C5H4G027680	FBD	Chr5.4	57533473	57534760	0	0	0
	MsZm1C5H4G028120	T2	Chr5.4	58326812	58331093	0.109408	0.314196	0
	MsZm1C5H4G028740	FBD	Chr5.4	59453375	59454647	0	0	0
24	MsZm1C6H3G012820	T2	Chr6.3	32828115	32829346	0	0.67618	0
	MsZm1C6H3G013260	FBD	Chr6.3	34542232	34543462	0	0	0
	MsZm1C6H3G013310	FBD	Chr6.3	34645830	34647069	0	0	0
25	MsZm1C7H4G000390	T2	Chr7.4	5715273	5716154	0	0	0
	MsZm1C7H4G000930	FBD	Chr7.4	6834979	6836561	0.0827945	0.392647	1.31882
	MsZm1C7H4G001050	FBD	Chr7.4	6954382	6955633	0	0	0
	MsZm1C7H4G001090	FBD	Chr7.4	7075550	7076837	0	0	0
	MsZm1C7H4G001100	FBD	Chr7.4	7090955	7092299	0	0	0
	MsZm1C7H4G001110	FBD	Chr7.4	7138241	7139466	0	0	0
	MsZm1C7H4G001120	FBD	Chr7.4	7210860	7212069	0	0	0

## Sheet: Supplementary Table 8
Supplementary Table 8. Homologous sequences of the S genes in Medicago sativa haplotype-resolved genomes.
Species	Genome	Gene	Chromosome	Start	End
Medicago sativa ssp. sativa	Bolivia	S-DUF295	Chr3.1	28874861	28875979
Medicago sativa ssp. sativa	Bolivia	S-DUF295	Chr3.1	28951383	28952456
Medicago sativa ssp. sativa	Bolivia	S-DUF295	Chr3.1	28963953	28965107
Medicago sativa ssp. sativa	Bolivia	S-DUF295	Chr3.1	28974174	28975199
Medicago sativa ssp. sativa	Bolivia	S-DUF295	Chr3.2	29814538	29815656
Medicago sativa ssp. sativa	Bolivia	S-DUF295	Chr3.2	29854784	29855860
Medicago sativa ssp. sativa	Bolivia	S-DUF295	Chr3.2	29913071	29914156
Medicago sativa ssp. sativa	Bolivia	FIRS-RNase	Chr3.2	29986722	29987643
Medicago sativa ssp. sativa	Bolivia	FIRS-RNase	Chr3.2	30118746	30119794
Medicago sativa ssp. sativa	Bolivia	FIRS-RNase	Chr3.2	30122598	30123655
Medicago sativa ssp. sativa	Bolivia	S-DUF295	Chr3.3	27072949	27074067
Medicago sativa ssp. sativa	Bolivia	S-DUF295	Chr3.3	27122744	27123817
Medicago sativa ssp. sativa	Bolivia	S-DUF295	Chr3.3	27130722	27131798
Medicago sativa ssp. sativa	Bolivia	S-DUF295	Chr3.3	27151649	27152803
Medicago sativa ssp. sativa	Bolivia	S-DUF295	Chr3.3	27156737	27157834
Medicago sativa ssp. sativa	Bolivia	FIRS-RNase	Chr3.3	27235428	27236349
Medicago sativa ssp. sativa	Bolivia	FIRS-RNase	Chr3.3	27355794	27356851
Medicago sativa ssp. sativa	Bolivia	FIRS-RNase	Chr3.3	27359655	27360700
Medicago sativa ssp. sativa	Bolivia	S-DUF295	Chr3.4	20135582	20136700
Medicago sativa ssp. sativa	Bolivia	S-DUF295	Chr3.4	20202663	20203847
Medicago sativa ssp. sativa	Bolivia	S-DUF295	Chr3.4	20210481	20211635
Medicago sativa ssp. sativa	Bolivia	S-DUF295	Chr3.4	20244904	20246001
Medicago sativa ssp. sativa	Bolivia	S-DUF295	Chr3.4	20259523	20260599
Medicago sativa ssp. sativa	Bolivia	S-DUF295	Chr3.4	20275714	20276868
Medicago sativa ssp. sativa	Bolivia	S-DUF295	Chr3.4	20285518	20286606
Medicago sativa ssp. sativa	Bolivia	S-DUF295	Chr3.4	20326743	20327816
Medicago sativa ssp. sativa	Bolivia	S-DUF295	Chr3.4	20335756	20336910
Medicago sativa ssp. sativa	Bolivia	S-DUF295	Chr3.4	20343157	20344245
Medicago sativa ssp. sativa	Bolivia	S-DUF295	Chr3.4	20357547	20358605
Medicago sativa ssp. sativa	Bolivia	FIRS-RNase	Chr3.4	20464002	20465074
Medicago sativa ssp. sativa	Bolivia	FIRS-RNase	Chr3.4	20592427	20593342
Medicago sativa ssp. sativa	Zm1	S-DUF295	Chr3.1	23233065	23234183
Medicago sativa ssp. sativa	Zm1	S-DUF295	Chr3.1	23300081	23301265
Medicago sativa ssp. sativa	Zm1	S-DUF295	Chr3.1	23307899	23309053
Medicago sativa ssp. sativa	Zm1	S-DUF295	Chr3.1	23328233	23329330
Medicago sativa ssp. sativa	Zm1	S-DUF295	Chr3.1	23342924	23343944
Medicago sativa ssp. sativa	Zm1	S-DUF295	Chr3.1	23359059	23360213
Medicago sativa ssp. sativa	Zm1	S-DUF295	Chr3.1	23368863	23369951
Medicago sativa ssp. sativa	Zm1	S-DUF295	Chr3.1	23410081	23411154
Medicago sativa ssp. sativa	Zm1	S-DUF295	Chr3.1	23419094	23420248
Medicago sativa ssp. sativa	Zm1	S-DUF295	Chr3.1	23426495	23427586
Medicago sativa ssp. sativa	Zm1	FIRS-RNase	Chr3.1	23532417	23532046
Medicago sativa ssp. sativa	Zm1	S-DUF295	Chr3.2	23691307	23692425
Medicago sativa ssp. sativa	Zm1	S-DUF295	Chr3.2	23789726	23790910
Medicago sativa ssp. sativa	Zm1	S-DUF295	Chr3.2	23801124	23802278
Medicago sativa ssp. sativa	Zm1	S-DUF295	Chr3.2	23823424	23824521
Medicago sativa ssp. sativa	Zm1	S-DUF295	Chr3.2	23869372	23870445
Medicago sativa ssp. sativa	Zm1	S-DUF295	Chr3.2	23879805	23880959
Medicago sativa ssp. sativa	Zm1	S-DUF295	Chr3.2	23890276	23891370
Medicago sativa ssp. sativa	Zm1	S-DUF295	Chr3.2	23897062	23898147
Medicago sativa ssp. sativa	Zm1	FIRS-RNase	Chr3.2	24018226	24017264
Medicago sativa ssp. sativa	Zm1	S-DUF295	Chr3.3	26421353	26422471
Medicago sativa ssp. sativa	Zm1	S-DUF295	Chr3.3	26467835	26468908
Medicago sativa ssp. sativa	Zm1	S-DUF295	Chr3.3	26475813	26476889
Medicago sativa ssp. sativa	Zm1	S-DUF295	Chr3.3	26496770	26497924
Medicago sativa ssp. sativa	Zm1	S-DUF295	Chr3.3	26501858	26502955
Medicago sativa ssp. sativa	Zm1	FIRS-RNase	Chr3.3	26585876	26585451
Medicago sativa ssp. sativa	Zm1	FIRS-RNase	Chr3.3	26696721	26696323
Medicago sativa ssp. sativa	Zm1	S-DUF295	Chr3.4	24796132	24797250
Medicago sativa ssp. sativa	Zm1	S-DUF295	Chr3.4	24878249	24879514
Medicago sativa ssp. sativa	Zm1	S-DUF295	Chr3.4	24901345	24902499
Medicago sativa ssp. sativa	Zm1	S-DUF295	Chr3.4	24932463	24933548
Medicago sativa ssp. sativa	Zm1	S-DUF295	Chr3.4	24952675	24953670
Medicago sativa ssp. sativa	Zm1	S-DUF295	Chr3.4	24973948	24975102
Medicago sativa ssp. sativa	Zm1	S-DUF295	Chr3.4	25029040	25030119
Medicago sativa ssp. sativa	Zm1	S-DUF295	Chr3.4	25037453	25038516
Medicago sativa ssp. sativa	Xinjiangdaye	S-DUF295	Chr3.1	22477798	22478822
Medicago sativa ssp. sativa	Xinjiangdaye	S-DUF295	Chr3.1	22558490	22559582
Medicago sativa ssp. sativa	Xinjiangdaye	S-DUF295	Chr3.1	22573210	22574365
Medicago sativa ssp. sativa	Xinjiangdaye	S-DUF295	Chr3.1	22579131	22580223
Medicago sativa ssp. sativa	Xinjiangdaye	S-DUF295	Chr3.1	22586214	22587299
Medicago sativa ssp. sativa	Xinjiangdaye	S-DUF295	Chr3.1	22609735	22610890
Medicago sativa ssp. sativa	Xinjiangdaye	S-DUF295	Chr3.1	22621337	22622438
Medicago sativa ssp. sativa	Xinjiangdaye	S-DUF295	Chr3.2	21021916	21023035
Medicago sativa ssp. sativa	Xinjiangdaye	S-DUF295	Chr3.2	21084014	21085169
Medicago sativa ssp. sativa	Xinjiangdaye	S-DUF295	Chr3.2	21094198	21095287
Medicago sativa ssp. sativa	Xinjiangdaye	FIRS-RNase	Chr3.2	21241320	21242242
Medicago sativa ssp. sativa	Xinjiangdaye	FIRS-RNase	Chr3.2	21407779	21408701
Medicago sativa ssp. sativa	Xinjiangdaye	S-DUF295	Chr3.3	22956739	22957813
Medicago sativa ssp. sativa	Xinjiangdaye	S-DUF295	Chr3.3	22968414	22969569
Medicago sativa ssp. sativa	Xinjiangdaye	S-DUF295	Chr3.3	22975957	22977046
Medicago sativa ssp. sativa	Xinjiangdaye	FIRS-RNase	Chr3.3	23047730	23048651
Medicago sativa ssp. sativa	Xinjiangdaye	FIRS-RNase	Chr3.3	23157978	23159008
Medicago sativa ssp. sativa	Xinjiangdaye	FIRS-RNase	Chr3.3	23368999	23369921
Medicago sativa ssp. sativa	Xinjiangdaye	S-DUF295	Chr3.4	23733097	23734216
Medicago sativa ssp. sativa	Xinjiangdaye	S-DUF295	Chr3.4	23775375	23776455
Medicago sativa ssp. sativa	Xinjiangdaye	S-DUF295	Chr3.4	23785749	23786904
Medicago sativa ssp. sativa	Xinjiangdaye	S-DUF295	Chr3.4	23797531	23798617
Medicago sativa ssp. sativa	Xinjiangdaye	FIRS-RNase	Chr3.4	23895663	23896622
Medicago sativa ssp. sativa	ZM4	S-DUF295	chr3_1	30056907	30058025
Medicago sativa ssp. sativa	ZM4	S-DUF295	chr3_1	30121092	30122246
Medicago sativa ssp. sativa	ZM4	S-DUF295	chr3_1	30131275	30132366
Medicago sativa ssp. sativa	ZM4	FIRS-RNase	chr3_1	30239554	30240475
Medicago sativa ssp. sativa	ZM4	FIRS-RNase	chr3_1	30333150	30334201
Medicago sativa ssp. sativa	ZM4	S-DUF295	chr3_2	28363831	28364949
Medicago sativa ssp. sativa	ZM4	S-DUF295	chr3_2	28430809	28431888
Medicago sativa ssp. sativa	ZM4	S-DUF295	chr3_2	28441183	28442337
Medicago sativa ssp. sativa	ZM4	S-DUF295	chr3_2	28452966	28454051
Medicago sativa ssp. sativa	ZM4	FIRS-RNase	chr3_2	28670830	28671752
Medicago sativa ssp. sativa	ZM4	S-DUF295	chr3_3	26003990	26005108
Medicago sativa ssp. sativa	ZM4	S-DUF295	chr3_3	26080254	26081405
Medicago sativa ssp. sativa	ZM4	S-DUF295	chr3_3	26090324	26091412
Medicago sativa ssp. sativa	ZM4	FIRS-RNase	chr3_3	26180205	26181164
Medicago sativa ssp. sativa	ZM4	S-DUF295	chr3_4	25872041	25873159
Medicago sativa ssp. sativa	ZM4	S-DUF295	chr3_4	25914329	25915408
Medicago sativa ssp. sativa	ZM4	S-DUF295	chr3_4	25924703	25925857
Medicago sativa ssp. sativa	ZM4	S-DUF295	chr3_4	25936678	25937757
Medicago sativa ssp. sativa	ZM4	S-DUF295	chr3_4	25947052	25948206
Medicago sativa ssp. sativa	ZM4	S-DUF295	chr3_4	25958838	25959923
Medicago sativa ssp. falcata	Mf	S-DUF295	Chr3.1	25052643	25053762
Medicago sativa ssp. falcata	Mf	S-DUF295	Chr3.1	25157855	25159010
Medicago sativa ssp. falcata	Mf	S-DUF295	Chr3.1	25188972	25190057
Medicago sativa ssp. falcata	Mf	S-DUF295	Chr3.1	25230459	25231614
Medicago sativa ssp. falcata	Mf	S-DUF295	Chr3.1	25285551	25286631
Medicago sativa ssp. falcata	Mf	S-DUF295	Chr3.1	25293964	25295028
Medicago sativa ssp. falcata	Mf	S-DUF295	Chr3.2	24575662	24576781
Medicago sativa ssp. falcata	Mf	S-DUF295	Chr3.2	24638962	24640081
Medicago sativa ssp. falcata	Mf	S-DUF295	Chr3.2	24753667	24754822
Medicago sativa ssp. falcata	Mf	S-DUF295	Chr3.2	24764560	24765655
Medicago sativa ssp. falcata	Mf	S-DUF295	Chr3.2	24771770	24772855
Medicago sativa ssp. falcata	Mf	S-DUF295	Chr3.3	25421570	25422689
Medicago sativa ssp. falcata	Mf	S-DUF295	Chr3.3	25482976	25484131
Medicago sativa ssp. falcata	Mf	S-DUF295	Chr3.3	25491663	25492749
Medicago sativa ssp. falcata	Mf	S-DUF295	Chr3.3	25498982	25500067
Medicago sativa ssp. falcata	Mf	FIRS-RNase	Chr3.3	25617039	25617999
Medicago sativa ssp. falcata	Mf	S-DUF295	Chr3.4	24120547	24121666
Medicago sativa ssp. falcata	Mf	S-DUF295	Chr3.4	24237833	24238988
Medicago sativa ssp. falcata	Mf	S-DUF295	Chr3.4	24241848	24242952
Medicago sativa ssp. falcata	Mf	S-DUF295	Chr3.4	24249206	24250291
Medicago sativa ssp. falcata	Mf	S-DUF295	Chr3.4	24265221	24266293
Medicago sativa ssp. falcata	Mf	S-DUF295	Chr3.4	24338497	24339652
Medicago sativa ssp. falcata	Mf	S-DUF295	Chr3.4	24349580	24350666
Medicago sativa ssp. falcata	Mf	FIRS-RNase	Chr3.4	24576382	24577332

## Sheet: Supplementary Table 9
Supplementary Table 9. A list of primers used in this study.
Names	Sequences from 5'-3'	Purpose
MsFIRS3b-RNase-F	ATGTCACTCAATATGATTCCAG	Gene cloning
MsFIRS3b-RNase-R	TCATGGAAAGTACACGTCCG	Gene cloning
MsFIRS1-RNase-F	ATGTCACTCAATATGATTCCAA	Gene cloning
MsFIRS1-RNase-R	TCATGGAAAGTACACATCCGTTG	Gene cloning
MsS3b-DUF295-F	ATGCATGCTCGAGCGGCCGCCAGT	Gene cloning
MsS3b-DUF295-R	TCAGCTTTTGAAGATCCAATCCGG	Gene cloning
MsS3d-DUF295-F	ATGGCAGAGTCAGAATGGTCTGA	Gene cloning
MsS3d-DUF295-R	TCAGCTTTTGAAGATCCAATCCGG	Gene cloning
MsS1f-DUF295-F	ATGGCGGAGTCAGAATGGTCTGA	Gene cloning
MsS1f-DUF295-R	TCAGCTTTTGAAGATCCAATCCGG	Gene cloning
MsFIRS3b-RNAi-DpnI-F1	ACAATTACTATTTACAATTACGGATC	Vector construction
MsFIRS3b-RNAi-PstI-R1	TGAAGGAGAAAAACTAGACCTGCAGG	Vector construction
MsFIRS3b-RNAi- XmaI-F	GATGATGATAGTTACAGAGCCCGGG	Vector construction
MsFIRS3b-RNAi- BcuI-R	ATTAAAGCAGGACTCTAGGGACTAGT	Vector construction
MsFIRS-RNase-RNAi-F	ATGAAGGTTATCGCTGTAC	RNAi lines gene identification
MsFIRS-RNase-RNAi-R	GATTTAATTTCAGCGGCCAGC	RNAi lines gene identification
MsFIRS3b-RNase-RT-F	CTCTATCTCATGATTCTCCATC	Gene expression analysis
MsFIRS3b-RNase-RT-R	CATCGTTTGTAATAGCAGTGTC	Gene expression analysis
MsFIRS1-RNase-RT-F	GGGTCTATTACTGGCTTCTTCT	Gene expression analysis
MsFIRS1-RNase-RT-R	TTTTGGCCAATACTTGCGGAGA	Gene expression analysis
MsActin-F	AGAAGCATTTCCTGTGGACA	Gene expression analysis
MsActin-R	GTATTGCTGACCGTATGAGC	Gene expression analysis
MsFIRS3b-RNase-F1	GGGGACAAGTTTGTACAAAAAAGCAGGCTCCATGTCACTCAATATGATTCCAG	Vector construction
MsFIRS3b-RNase-R1	GGGGACCACTTTGTACAAGAAAGCTGGGTCTGGAAAGTACACGTCCG	Vector construction
MsFIRS3b-RNaseΔSP-F	GGGGACAAGTTTGTACAAAAAAGCAGGCTCCATGTATTCAACACCAAATAACACCAG	Vector construction
MsFIRS3b-RNaseΔSP-R	GGGGACCACTTTGTACAAGAAAGCTGGGTCTGGAAAGTACACGTCCG	Vector construction
MsFIRS3b-RNaseΔSPΔIDR-F	GGGGACAAGTTTGTACAAAAAAGCAGGCTCCATGGTTGAAACATGGCCAGC	Vector construction
MsFIRS3b-RNaseΔSPΔIDR-R	GGGGACCACTTTGTACAAGAAAGCTGGGTCTGGAAAGTACACGTCCG	Vector construction
MsFIRS3b-RNase-SP-F	GGGGACAAGTTTGTACAAAAAAGCAGGCTCCATGTCACTCAATATGATTCCAG	Vector construction
MsFIRS3b-RNase-SP-R	GGGGACCACTTTGTACAAGAAAGCTGGGTCAGAGCATGAAAAAGAAGCC	Vector construction
S-MsS3b-DUF295	ACCGTTGAATCCGGCCCAATCAT	S or AS-ODN sequences
AS-MsS3b-DUF295	ATGATTGGGCCGGATTCAACGGT	S or AS-ODN sequences
S-MsS3d-DUF295	AAGCAGAAGCGGAAAACGAACAT	S or AS-ODN sequences
AS-MsS3d-DUF295	ATGTTCGTTTTCCGCTTCTGCTT	S or AS-ODN sequences
S-MsS1f-DUF295	GCATTGCTTGTTCCTAGAAGAGAGG	S or AS-ODN sequences
AS-MsS1f-DUF295	CCTCTCTTCTAGGAACAAGCAATGC	S or AS-ODN sequences
MsFIRS3b-RNase-GST-BamHI-F	GATCTGGTTCCGCGTGGATCCACACCAAATAACACCAGCTAT	Vector construction
MsFIRS3b-RNase-GST-EcoRI-R	CTCGAGTCGACCCGGGAATTCTCATGGAAAGTACACGTCCG	Vector construction
MsFIRS3b-RNase-ΔIDR-GST-BamHI-F	GATCTGGTTCCGCGTGGATCCAAGATAGTTGAAACATGGCC	Vector construction
MsFIRS3b-RNase-GST-EcoRI-R	CTCGAGTCGACCCGGGAATTCTCATGGAAAGTACACGTCCG	Vector construction
MsS3b-DUF295-F1	GGGGACAAGTTTGTACAAAAAAGCAGGCTCCATGGCGGAGGCAGAC	Vector construction
MsS3b-DUF295-R1	GGGGACCACTTTGTACAAGAAAGCTGGGTCGCTCTTAAGGATCCAATCCG	Vector construction
Note: aF: forward primer.
bR: reverse primer.

## Sheet: Supplementary Table 10
Supplementary Table 10. Sources of genome assemblies used in comparative genomic analyses.
Species	Reference
M. sativa cv Xinjiangdaye	https://doi.org/10.1038/s41467-020-16338-x
M. sativa cv Zhongmu-1	https://doi.org/10.1016/j.molp.2020.07.003
M. sativa cv Zhongmu-4	https://doi.org/10.1016/j.xplc.2025.101691
M. sativa subsp. caerulea	https://doi.org/10.1038/s41438-020-00417-7
M. sativa subsp. falcata	https://doi.org/10.1007/s11427-024-2753-2
Medicago truncatula	https://doi.org/10.1038/s41477-018-0286-7
Medicago polymorpha	https://doi.org/10.1038/s41438-021-00483-5
Medicago arabica	https://doi.org/10.12688/wellcomeopenres.20996.2
Medicago lupulina	https://doi.org/10.12688/wellcomeopenres.23134.2
Medicago ruthenica	https://doi.org/10.1186/s12915-021-01033-0
Melilotus officinalis	https://doi.org/10.1186/s12863-024-01224-y
Trigonella corniculata	https://doi.org/10.1038/s41597-025-04858-4
Trifolium dubium	https://doi.org/10.12688/wellcomeopenres.21191.1
Trifolium subterraneum	https://doi.org/10.12688/wellcomeopenres.21192.1
Trifolium alexandrinum	https://doi.org/10.1093/dnares/dsae036
Trifolium striatum	GCA_964059935.1
Trifolium pratense	https://doi.org/10.1038/srep17394
Trifolium fragiferum	https://doi.org/10.12688/wellcomeopenres.21162.1
Trifolium occidentale	GCA_964059555.1
Trifolium repens	https://doi.org/10.1093/gbe/evad146
Vicia sativa	GCA_964197575.1
Lathyrus sativus	https://doi.org/10.1038/s41597-024-03868-y
Pisum sativum	https://doi.org/10.1038/s41588-022-01172-2
Cicer arietinum	https://doi.org/10.1016/j.jare.2021.10.009
Glycyrrhiza uralensis	https://doi.org/10.1038/s41598-025-92115-4
Astragalus membranaceus	https://doi.org/10.1038/s41477-024-01827-4
Oxytropis ochrocephala	https://doi.org/10.1111/1755-0998.13695
Calophaca sinica	https://doi.org/10.1093/dnares/dsae011
Ebenus cretica	GCA_964291055.3
Lotus japonicus	https://doi.org/10.1093/dnares/dsaa015
Acmispon strigosus	GCA_030819835.1
Sesbania bispinosa	GCA_026901365.1
Cyamopsis tetragonoloba	https://doi.org/10.1016/j.indcrop.2024.118748
Abrus pulchellus	https://doi.org/10.1002/tpg2.20236
Lespedeza cuneata	https://doi.org/10.1016/j.japb.2023.10.004
Glycine max	https://doi.org/10.1016/j.molp.2023.08.012
Phaseolus vulgaris	https://doi.org/10.1038/ng.3008
Gastrolobium villosum	GCA_032173675.1
Lupinus albus	https://doi.org/10.1038/s41467-019-14197-9
Crotalaria pallida	https://doi.org/10.1093/gigascience/giae063
Sophora flavescens	https://doi.org/10.1038/s41597-023-02490-8
Ormosia purpureiflora	https://doi.org/10.1093/gigascience/giaf047
Arachis ipaensi	GCA_040739545.1
Styphnolobium japonicum	https://doi.org/10.1093/dnares/dsac009
Dipteryx alata	https://doi.org/10.4238/gmr18463
Acacia confusa	https://doi.org/10.1016/j.xplc.2024.100944
Mimosa pudica	https://doi.org/10.1038/s41477-023-01441-w
Senna tora	https://doi.org/10.1038/s41467-020-19681-1
Dicorynia guianensis	https://doi.org/10.1073/pnas.2313312121
Saraca asoca	https://doi.org/10.1101/2025.01.17.633512
Bauhinia variegata	https://doi.org/10.1093/dnares/dsac012
