# Supplementary material
Source: Research Square preprint supplement (doi:10.21203/rs.3.rs-8740276/v1)
Supplement: Supplementary file 1 [file b976854b8f10f2c59ec2886b.pdf]

1 **Extended Data Figures**

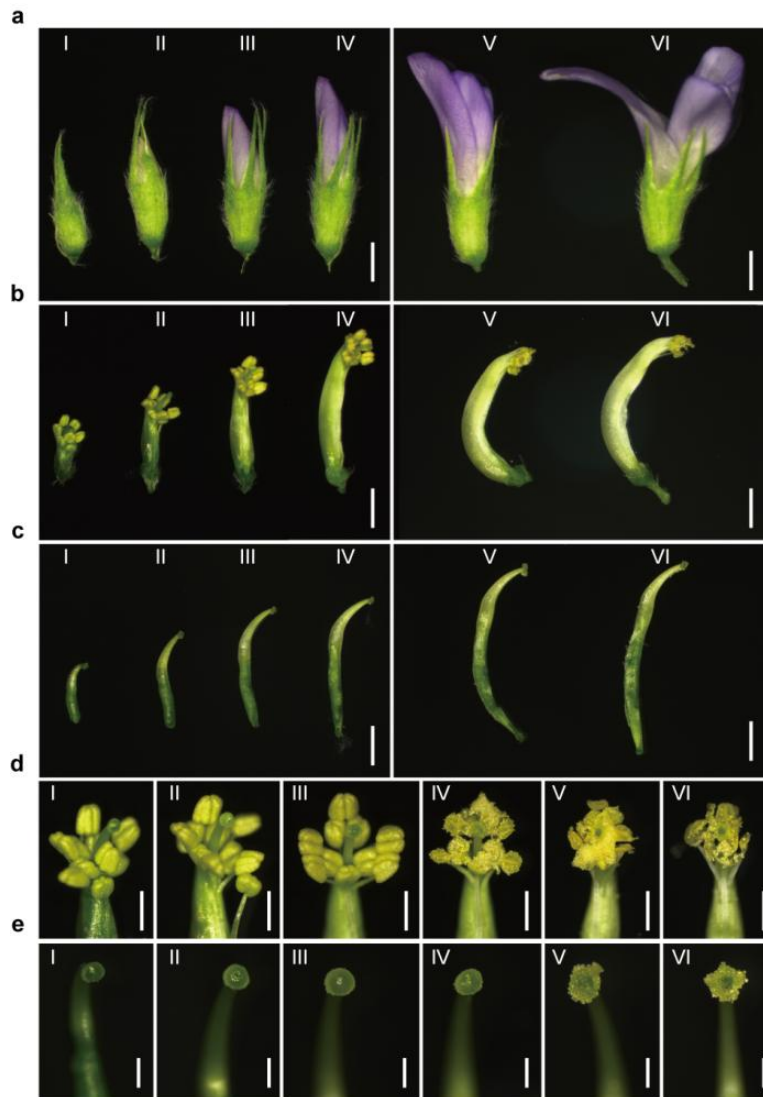

2

3 **Extended Data Fig. 1 | Developmental stages of alfalfa flower and floral organs. a,**  
4 **Intact flower. b, Sexual column, a structure with the staminal column surrounding the**  
5 **pistil. c, Pistil. Scale bars, 1 mm. d, Diadelphous stamens and pistils. e, Close-up of**  
6 **stigma. Six distinct developmental stages (I-VI) were designated. Scale bars, 500  $\mu$ m.**

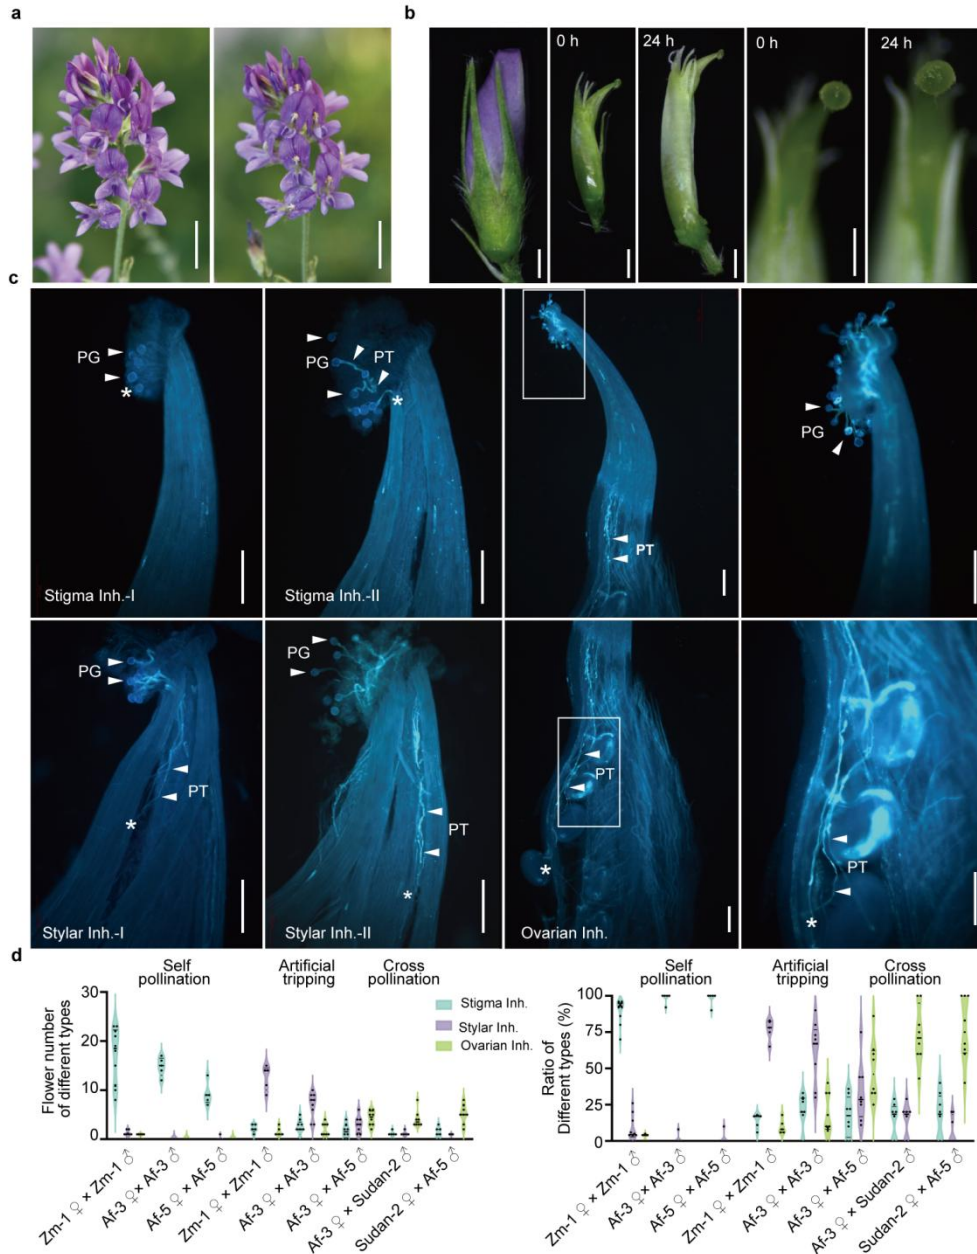

7

8 **Extended Data Fig. 2 | Multi-layered barriers inhibiting self-pollen tube growth**

9 **in alfalfa. a**, Self-pollination after artificial tripping at Stage VI. Left and Right:

10 Flowers before and after artificial tripping. Scale bars, 1 cm. **b**, Cross-pollination at

11 Stage III. **c**, In self-pollination, pollen tube growth is blocked at the surface of stigma

12 (stigma inh.). Artificial tripping partially bypasses this barrier, allowing limited pollen

13 tubes to grow into the style but arrested therein (stylar inh.). In contrast,

14 cross-pollination enables compatible interactions and some pollen tubes elongating

15 successfully to the ovules, whereas some others arrested in ovary (ovarian inh.). Scale

16 bars, 200  $\mu$ m. **d**, Number of flowers assessed per treatment (left), and ratio of

- 17 different pollen tube inhibitions observed in self- vs. cross-pollinated flowers (right).
- 18 White arrowheads point to pollen grains or pollen tubes.

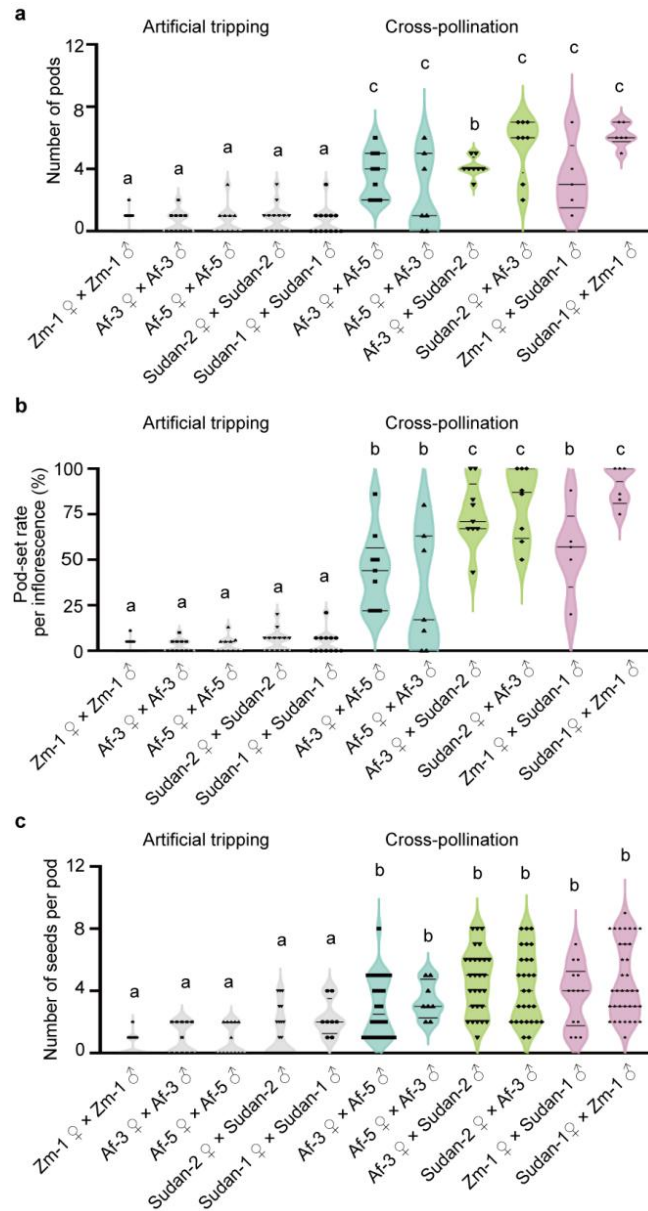

19

20 **Extended Data Fig. 3 | Pod and seed set in alfalfa after self- and cross-pollination.**

21 **a**, Number of pods formed per flower. **b**, Pod set rate per inflorescence. **c**, Number of  
 22 seeds per pod. Artificial self-pollination reduces pod formation and seed yield,  
 23 cross-pollination significantly increases both pod and seed production. Different  
 24 letters were assigned to the means based on a significant difference at the probability  
 25 level of  $p < 0.001$  as determined by Tukey's multiple range test.

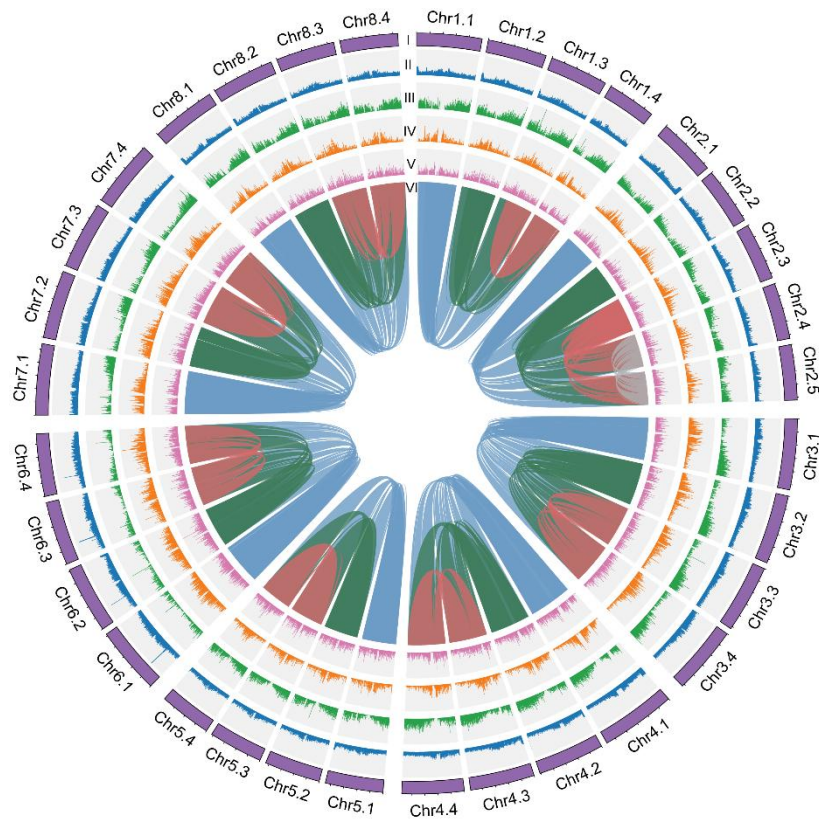

26

27 **Extended Data Fig. 4 | Circos plot of the phased genome assembly of *M. sativa* cv.**

28 **Zhongmu-1.** Tracks from outermost to innermost: (I) chromosomes, (II) GC content,

29 (III) gene density, (IV) Gypsy density, (V) Copia density, and (VI) intra-genomic

30 syntenic blocks. Chr2.5 indicates an extra chromosome 2.

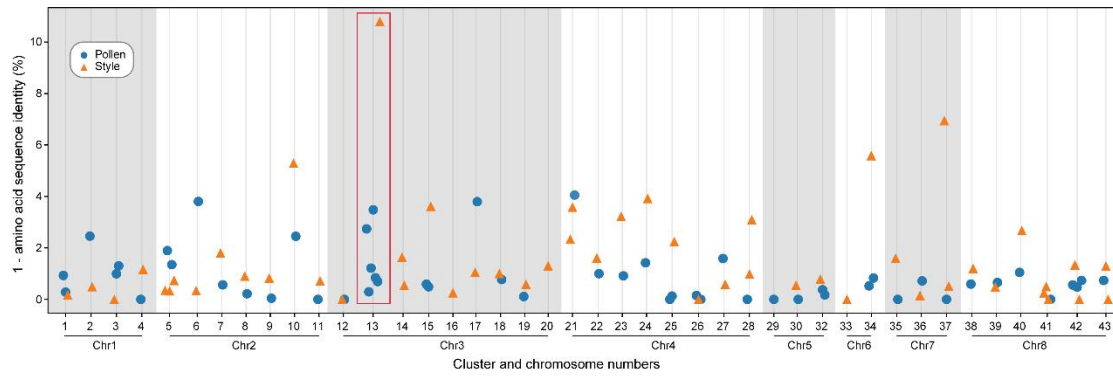

31

32 **Extended Data Fig. 5 | Protein sequence polymorphisms of pollen- and**  
 33 **pistil-specific alleles within the clusters.** Blue dots represent pollen-expressed  
 34 proteins, and orange triangles represent pistil-expressed proteins. Horizontal lines  
 35 under the X axis indicate the cluster IDs and their corresponding chromosomal  
 36 locations. The Y axis indicates amino acid polymorphisms expressed as 1-amino acid  
 37 sequence identity in percentage.

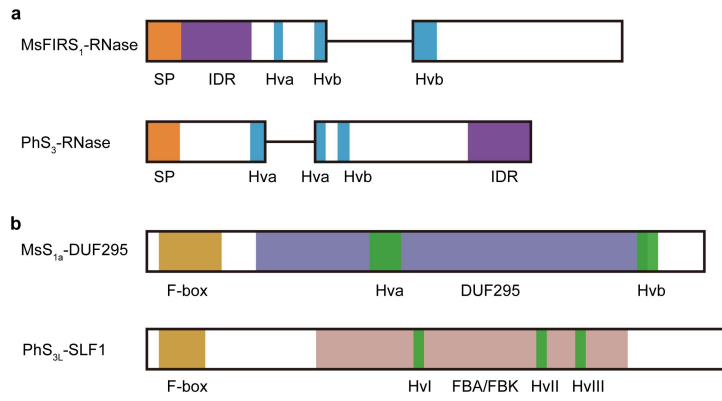

38

39 **Extended Data Fig. 6 | Gene structures and annotated protein domains of *S* genes**

40 **in alfalfa and petunia. a,** Gene structure and protein domain organizations of the

41 pistil *S* genes *MsFIRS<sub>1</sub>-RNase* from alfalfa and *PhS<sub>3</sub>-RNase* from petunia, respectively.

42 **b,** Gene structure and protein domain organizations of the pollen *S* genes

43 *MsS<sub>1a</sub>-DUF295* from alfalfa and *PhS<sub>3L</sub>-SLF1* from petunia, respectively.



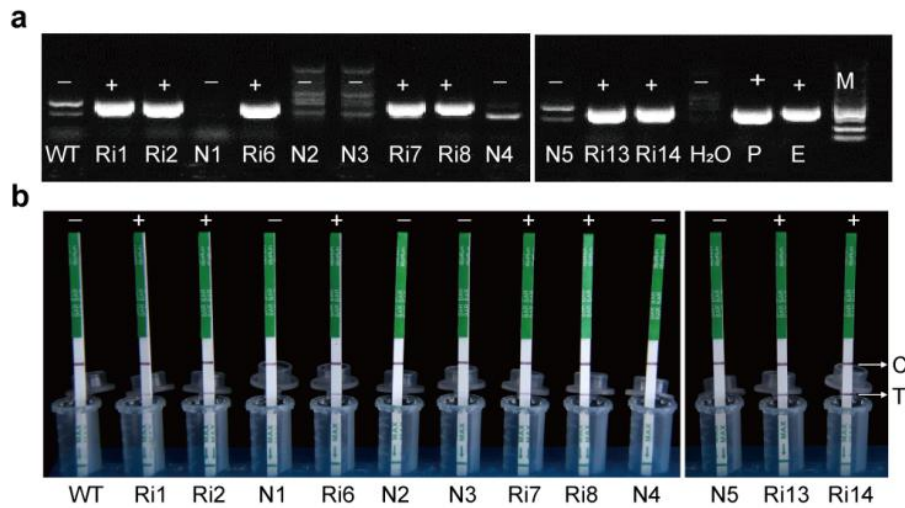

48

49 **Extended Data Fig. 8 | Molecular identification of transgenic alfalfa RNAi lines**

50 **of *MsFIRS<sub>3b</sub>-RNase*.** **a**, PCR amplification of the specific vector fragment from

51 genomic DNA of putative transgenic lines. Lanes: E, *Agrobacterium*

52 *tumefaciens* strain EHA105 harboring the plasmid; P, plasmid vector (positive

53 control); M, DNA molecular weight marker. **b**, Detection of the BAR selectable

54 marker protein using an immunochromatographic lateral flow assay. White arrows

55 indicate the control (C) and test (T) lines, positive result was interpreted when both

56 the C and T lines were clearly visible. '+' or '-' indicate transgenic positive and

57 non-transgenic negative controls.

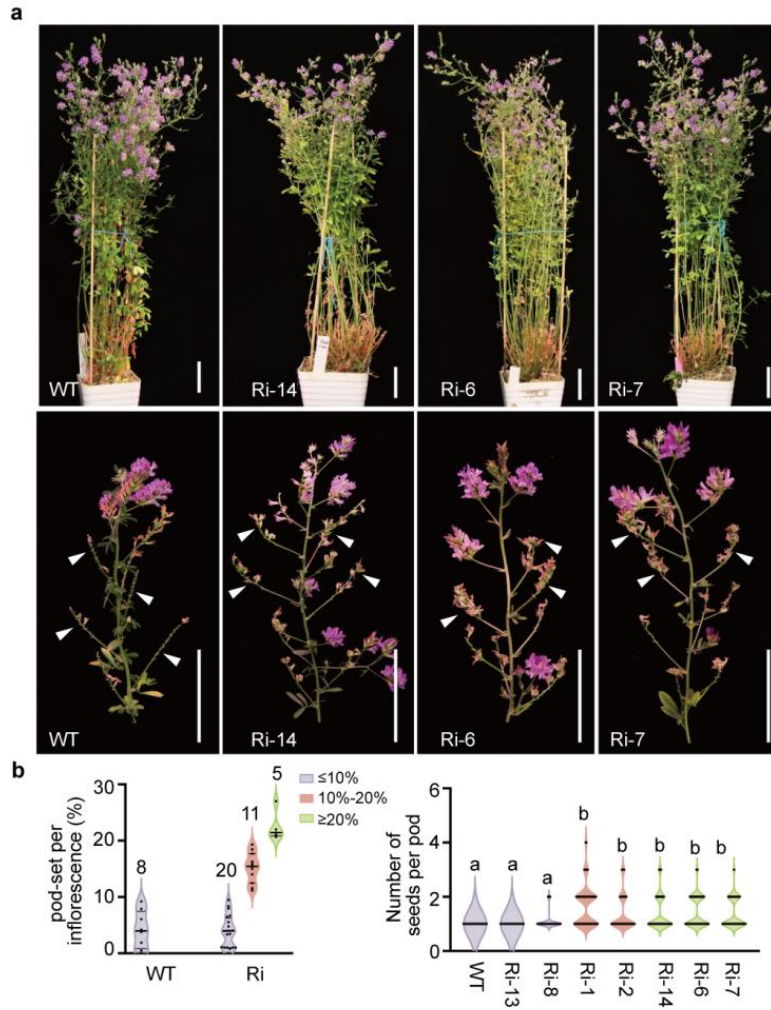

58

59 **Extended Data Fig. 9 | RNAi-mediated suppression of *MsFIRS<sub>3b</sub>-RNase***

60 **significantly enhances fertility in the transgenic alfalfa lines. a**, Compared to  
 61 non-transgenic controls, *MsFIRS<sub>3b</sub>-RNase* RNAi transgenic lines exhibited no obvious  
 62 morphological alterations (Top), but displayed a significant increase in fertility  
 63 (Bottom). Scale bars, 15 cm. **b**, Quantification of the distribution of pod set rates for  
 64 individual transgenic and non-transgenic lines. Left: Pod set rates were categorized  
 65 into the three ranges:  $\leq 10\%$ , 10-20% and  $\geq 20\%$ . Numbers above bars indicate the  
 66 plant count (n) in each category. Right: Number of seeds per pod.

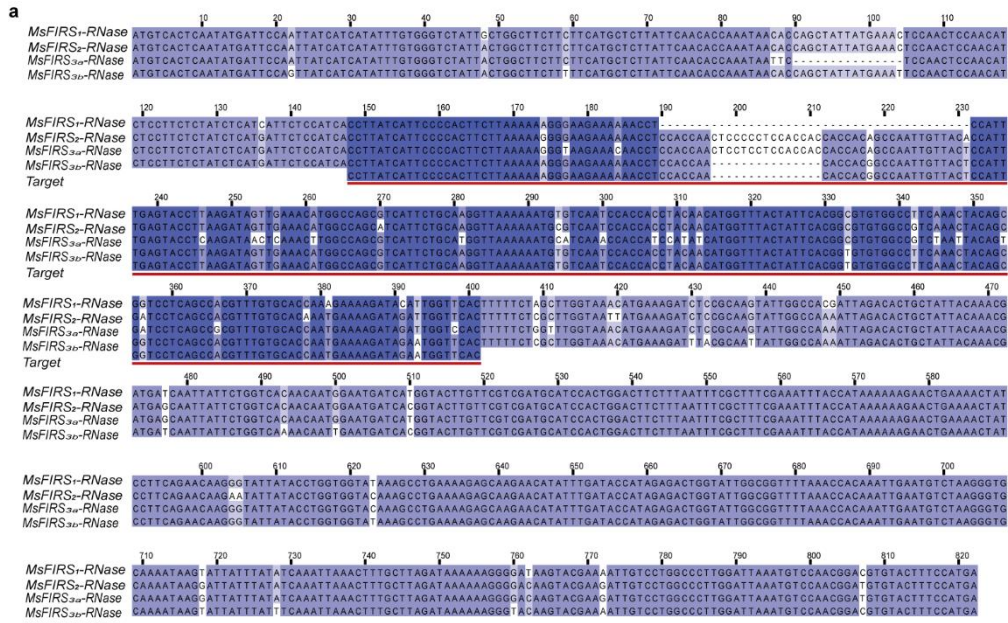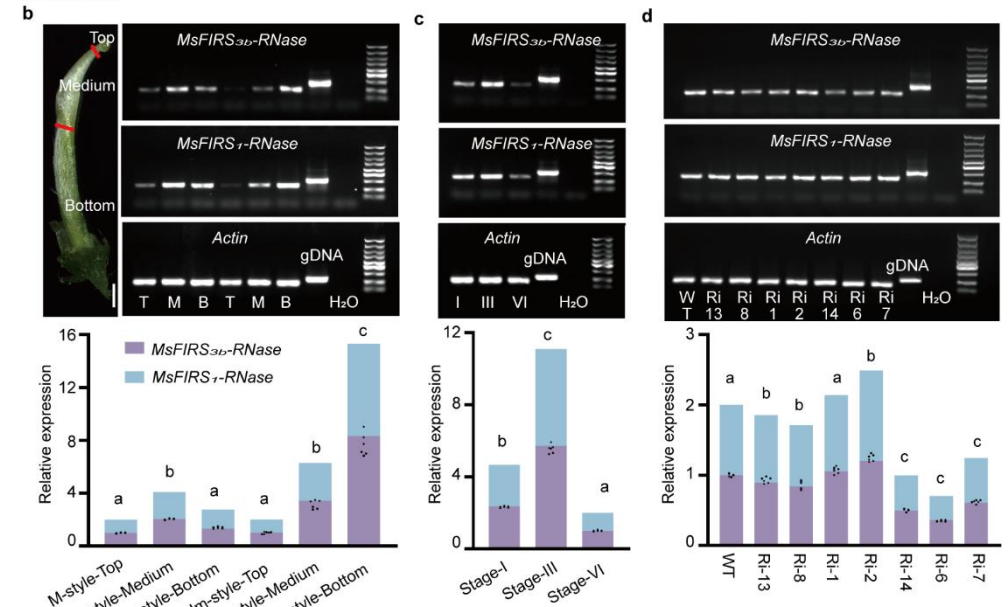

67

68 **Extended Data Fig. 10 | Spatiotemporal expression pattern of *MsFIRS<sub>1</sub>-RNase***

69 **and *MsFIRS<sub>3b</sub>-RNase*.** **a**, Multiple sequence alignment of *MsFIRS-RNases* and the

70 RNAi target sequence. The target RNAi sequence is highlighted with a red underline.

71 **b**, *MsFIRS-RNases* exhibit spatiotemporal expression gradient along the style (T,

72 stigma; M, style transmitting tract; B, ovary), and this expression pattern differs

73 significantly between mature (M-style) and immature (Im-style) pistils. Scale bars,

74 500  $\mu$ m. **c**, Temporal expression of *MsFIRS-RNases* during different development

75 stages I, III, and VI. **d**, *MsFIRS-RNase* expression is down-regulated in highly fertile

76 RNAi transgenic lines (e.g., lines Ri-6, Ri-7, and Ri-14). The upper panel shows

77 RT-PCR results, the lower panel shows quantitative real-time PCR (qPCR) results  
78 from three technical replicates. Data are presented as mean  $\pm$  SD. Different letters  
79 indicate significant differences at  $p < 0.01$  according to Duncan's multiple range test.

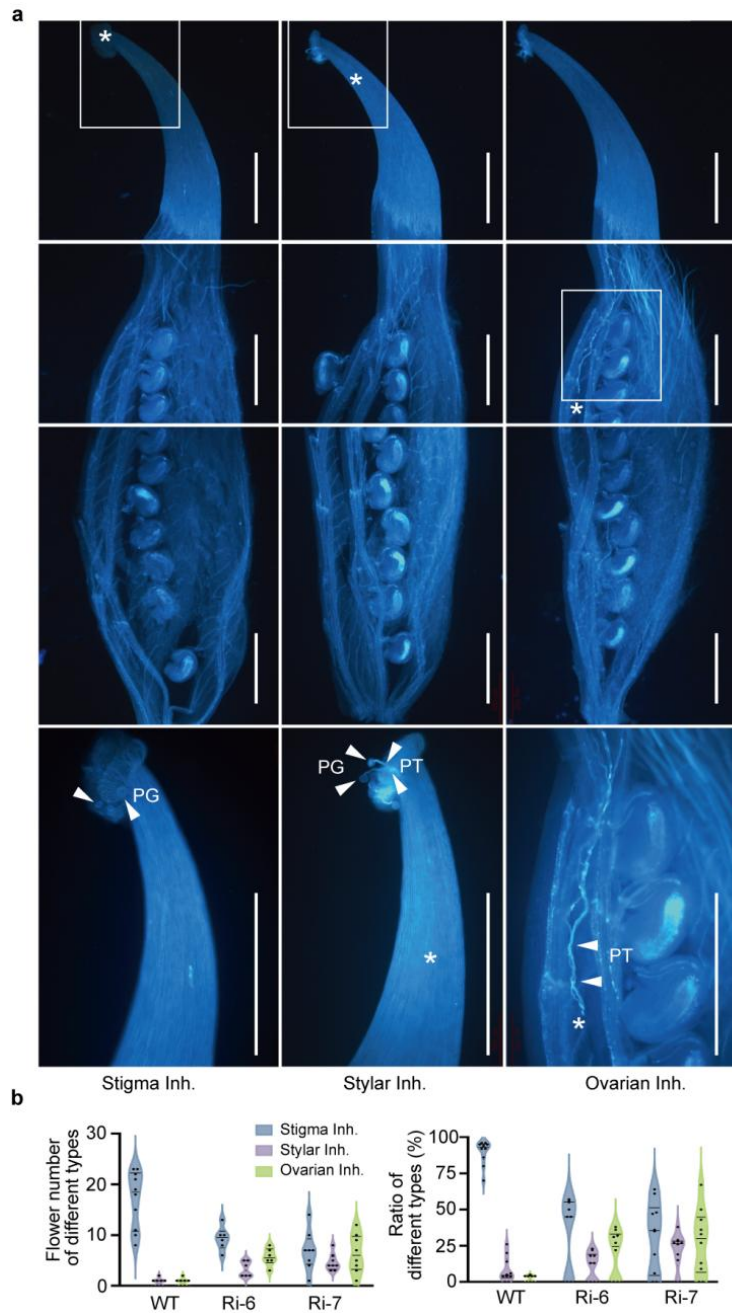

80

81 **Extended Data Fig. 11 | Comparison of pollen tube growth behaviors between the**  
 82 ***MsFIRS3b-RNase* RNAi transgenic lines and wild-type alfalfa.**

83 **a**, Three distinct categories of pollen tube growth were observed: Pollen tubes  
 84 arrested at the surface of stigma(stigma inh.), in the style (stylar. inh.), and in the  
 85 ovary (ovarian inh.). The lower panel images are close-up of the white boxed areas in  
 86 upper panels. Scale bars, 500  $\mu$ m. **b**, Quantification of the number of flowers assessed  
 87 for each treatment (left), and the ratio of pollen tube inhibition phenotypes (right).

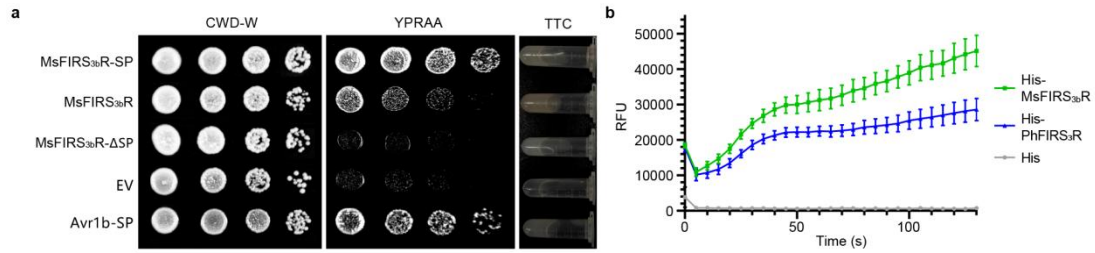

88

89 **Extended Data Fig. 12 | MsFIRS<sub>3b</sub>-RNase is a secreted ribonuclease.** **a**, Functional  
 90 validation of the signal peptide of MsFIRS<sub>3b</sub>-RNase. CWD-W and YPRAA indicate  
 91 media for the growth of yeast YTK12 strain carrying the signal peptide (SP) of  
 92 MsFIRS<sub>3b</sub>-RNase (MsFIRS<sub>3b</sub>-RNase-SP), full-length coding sequence of  
 93 MsFIRS<sub>3b</sub>-RNase (MsFIRS<sub>3b</sub>-RNase), MsFIRS<sub>3b</sub>-RNase without SP  
 94 (MsFIRS<sub>3b</sub>-RNase-ΔSP), and the SP of Avr1b (Avr1b-SP) fused in frame to the  
 95 invertase gene of the pSUC2 vector, respectively. TTC indicates whether the yeast  
 96 can reduce 2,3,5-triphenyltetrazolium chloride (TTC) to an insoluble red-coloured  
 97 compound (1,3,5-triphenylformazan, TPF). EV (empty pSUC2 vector) and Avr1b-SP  
 98 represent negative and positive controls, respectively. **b**, Ribonuclease activity of  
 99 His-MsS<sub>3b</sub>-RNase indicated by relative fluorescence unit (RFU). The RFU during a  
 100 time course indicated by the x axis is shown as mean ± s.e.m. (*n* = 3). His and  
 101 His-tagged *Petunia hybrida* S<sub>3</sub>-RNase (PhS<sub>3</sub>-RNase) represent negative and positive  
 102 control, respectively.

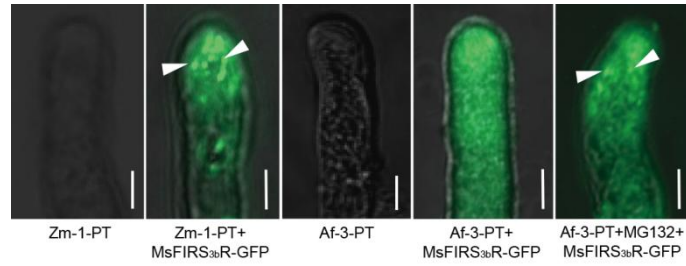

103

104 **Extended Data Fig. 13 | MsFIRS<sub>3b</sub>-RNase can enter both self and non-self pollen**

105 **tubes of alfalfa.** GFP fluorescence detection of recombinant MsFIRS<sub>3b</sub>-RNase-GFP

106 in self (Zm-1), non-self (Af-3), and MG132-treated non-self pollen tubes (PT) of

107 alfalfa. Scale bars, 5  $\mu$ m. White arrows point to the punctate structures.

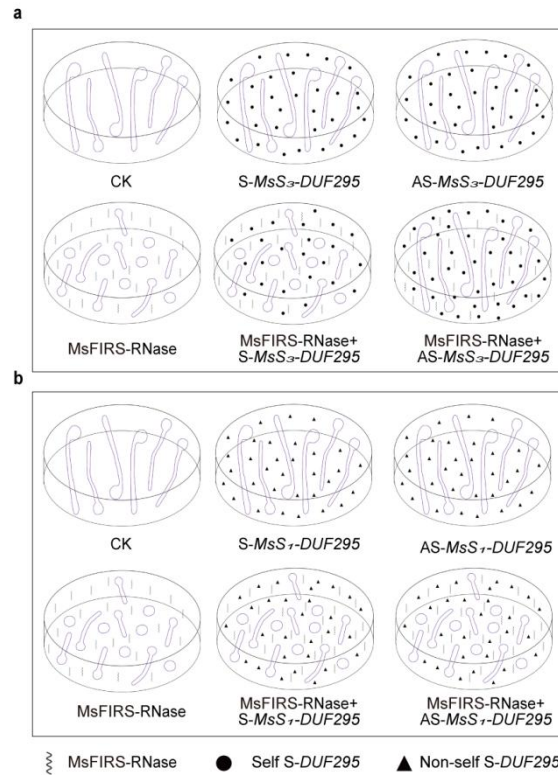

108

109 **Extended Data Fig. 14 | Schematic representation of antisense oligonucleotide**

110 **targeting *S-DUF295* action on alfalfa pollen tubes. a, Antisense**

111 **oligonucleotide-mediated suppression of self *MsS<sub>3</sub>-DUF295* alleviates**

112 **MsFIRS-RNase inhibition of the pollen tube growth. b, In contrast, suppression of**

113 **non-self *MsS<sub>1</sub>-DUF295* fails to rescue the MsFIRS-RNase induced pollen tube growth**

114 **inhibition.**

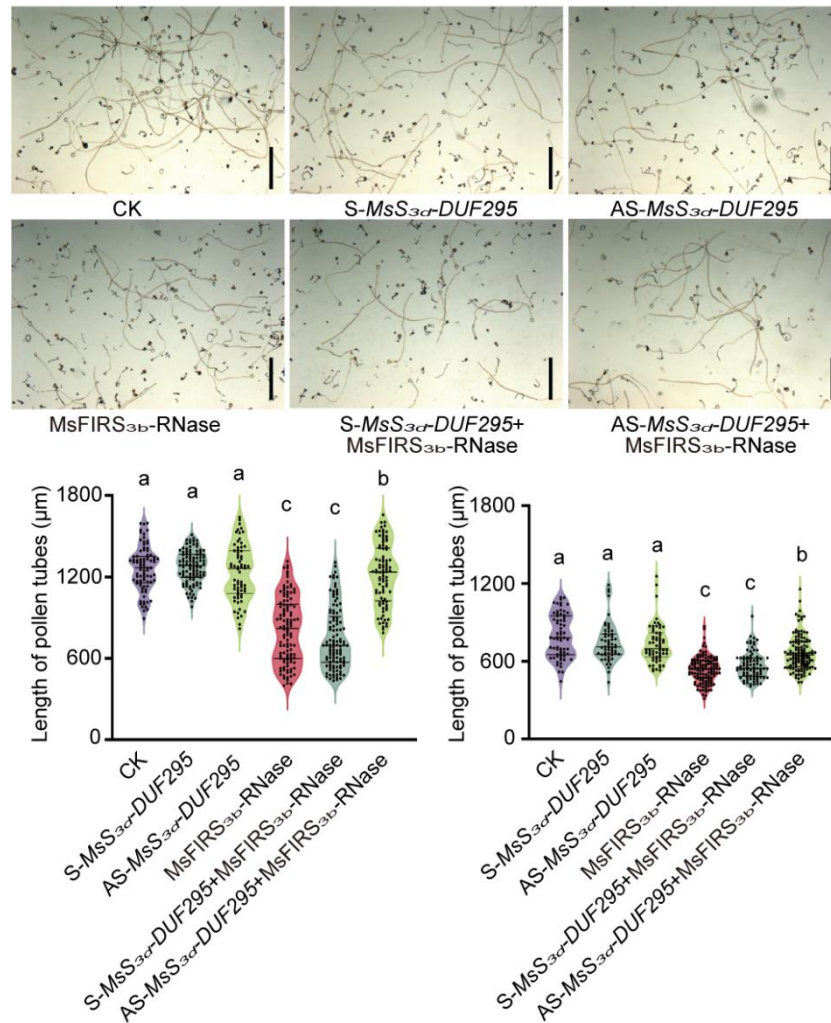

115

116 **Extended Data Fig. 15 | Suppression of *MsS3d-DUF295* by antisense**

117 **oligonucleotides alleviates MsFIRS<sub>3b</sub>-RNase mediated inhibition of the pollen**

118 **tube growth.** Top: Pollen tubes were incubated with MsFIRS<sub>3b</sub>-RNase and 10 μM

119 sense or antisense oligonucleotides targeting *MsS3d-DUF295*. Bottom: Quantification

120 of the pollen tube growth phenotypes after treatment with MsFIRS<sub>3b</sub>-RNase at 50

121 μg/ml (left) and 150 μg/ml (right). Different letters were assigned to the means based

122 on a significant difference at the probability level of  $p < 0.001$  as determined by

123 Tukey's multiple range test. Scale bars, 500 μm.

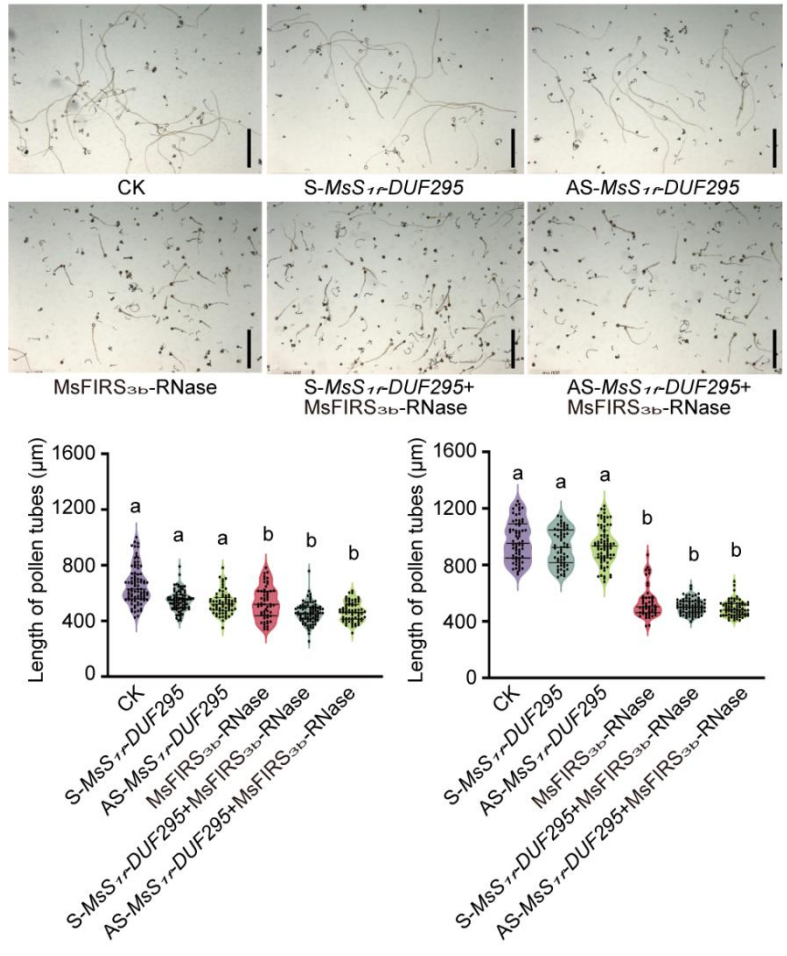

124

125 **Extended Data Fig. 16 | Suppression of non-self *MsS<sub>1r</sub>-DUF295* by antisense**

126 **oligonucleotides does not rescue *MsFIRS<sub>3b</sub>-RNase* induced pollen tube growth**

127 **inhibition.** Top: Antisense oligonucleotide targeting the non-self *MsS<sub>1r</sub>-DUF295* fails

128 to rescue FIRS-RNase-mediated toxicity. Bottom: Quantification of the pollen tube

129 growth following treatment with 50 µg/ml (left) and 150 µg/ml (right)

130 *MsFIRS<sub>3b</sub>-RNase*. Different letters above the bars indicate significant differences ( $p <$

131 0.001) as determined by Tukey's multiple range test. Scale bars, 500 µm.

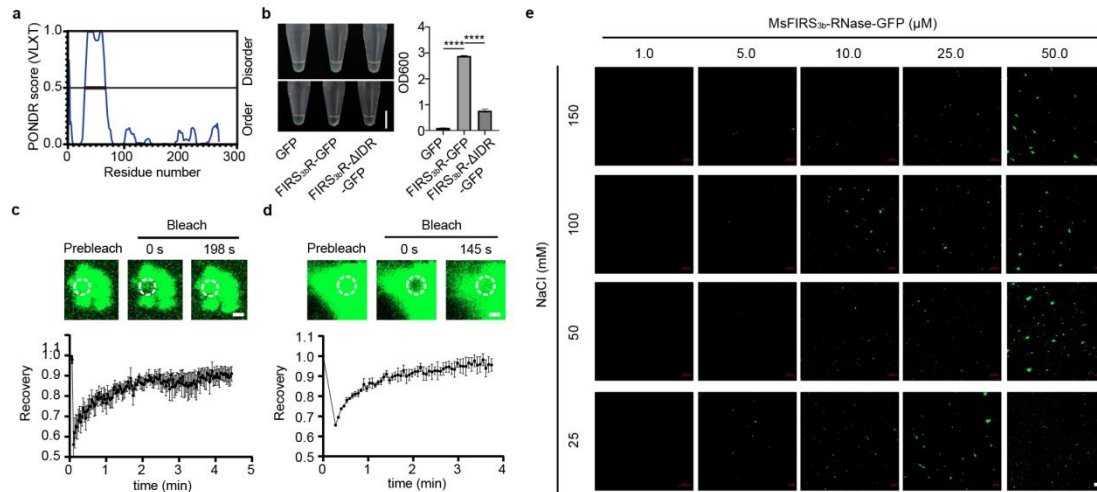

132

133 **Extended Data Fig. 17 | MsFIRS<sub>3b</sub>-RNase undergoes phase separation both *in***  
 134 ***vitro* and in *N. benthamiana* leaf cells. **a****, The intrinsically disordered regions of  
 135 MsFIRS<sub>3b</sub>-RNase predicted by PONDNR (Predictor of Natural Disordered Regions). **b**,  
 136 Turbidity detection of GFP, MsFIRS<sub>3b</sub>-RNase-GFP, and MsFIRS<sub>3b</sub>-RNase-ΔIDR-GFP.  
 137 Left, visualization of the turbidity (top) and gelation state (bottom) of GFP,  
 138 MsFIRS<sub>3b</sub>-RNase-GFP, and MsFIRS<sub>3b</sub>-RNase-ΔIDR-GFP. Scale bar, 1 cm. Right,  
 139 Analyses of turbidity indicated by OD600 shown as mean ± s.e.m. (n = 3). \*\*\*\*, *p* <  
 140 0.0001. **c,d**, Fluorescence recovery after photobleaching (FRAP) of  
 141 MsFIRS<sub>3b</sub>-RNase-GFP punctate structures *in vitro* (**c**) and in *N. benthamiana* leaf  
 142 cells (**d**) with the curves indicating the time course of the recovery shown at the  
 143 bottom. Scale bars, 10 μm. **e**, Confocal images showing the condensate dynamics of  
 144 MsFIRS<sub>3b</sub>-RNase-GFP at different protein and NaCl concentrations. Scale bar, 50 μm.

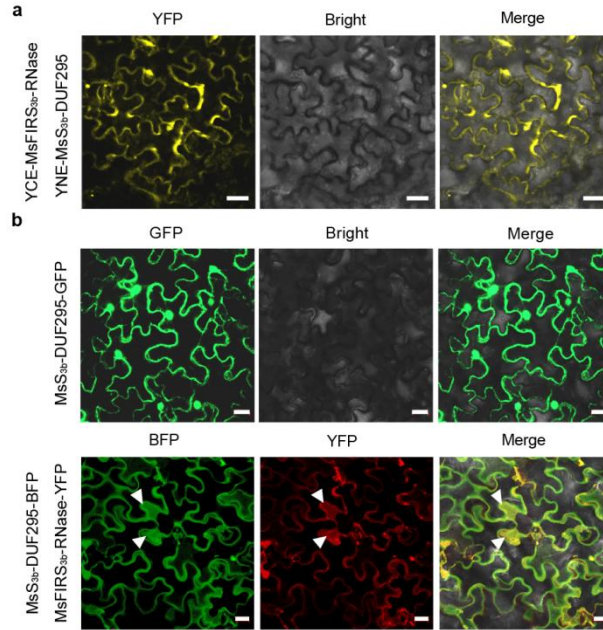

145

146 **Extended Data Fig. 18 | Interaction and co-localization between**

147 **MsFIRS<sub>3b</sub>-RNase and MsS<sub>3b</sub>-DUF295.** **a**, Interaction between MsFIRS<sub>3b</sub>-RNase and  
 148 MsS<sub>3b</sub>-DUF295 detected bimolecular fluorescence complementation (BiFC). YNE  
 149 and YCE, transiently expressed N- and C-terminal region of YFP, respectively. YFP,  
 150 Bright and Merge, the YFP fluorescence, bright and their merged field, respectively.  
 151 Scale bars, 20 μm. **b**, Subcellular localization of MsS<sub>3b</sub>-DUF295 and the  
 152 co-localization of MsFIRS<sub>3b</sub>-RNase and MsS<sub>3b</sub>-DUF295 in *Nicotiana benthamiana*  
 153 leaf cells. Top, Subcellular localization of GFP-tagged MsS<sub>2e</sub>-DUF295. GFP, Bright,  
 154 and Merge represent the GFP fluorescence, bright and their merged field, respectively.  
 155 Bottom, Co-localization of BFP-tagged MsS<sub>3b</sub>-DUF295 with YFP-tagged  
 156 MsFIRS<sub>3b</sub>-RNase in the plasmolyzed *N. benthamiana* leaf cells. White arrows point to  
 157 the fluorescent signals in the apoplast. Scale bars, 20 μm.

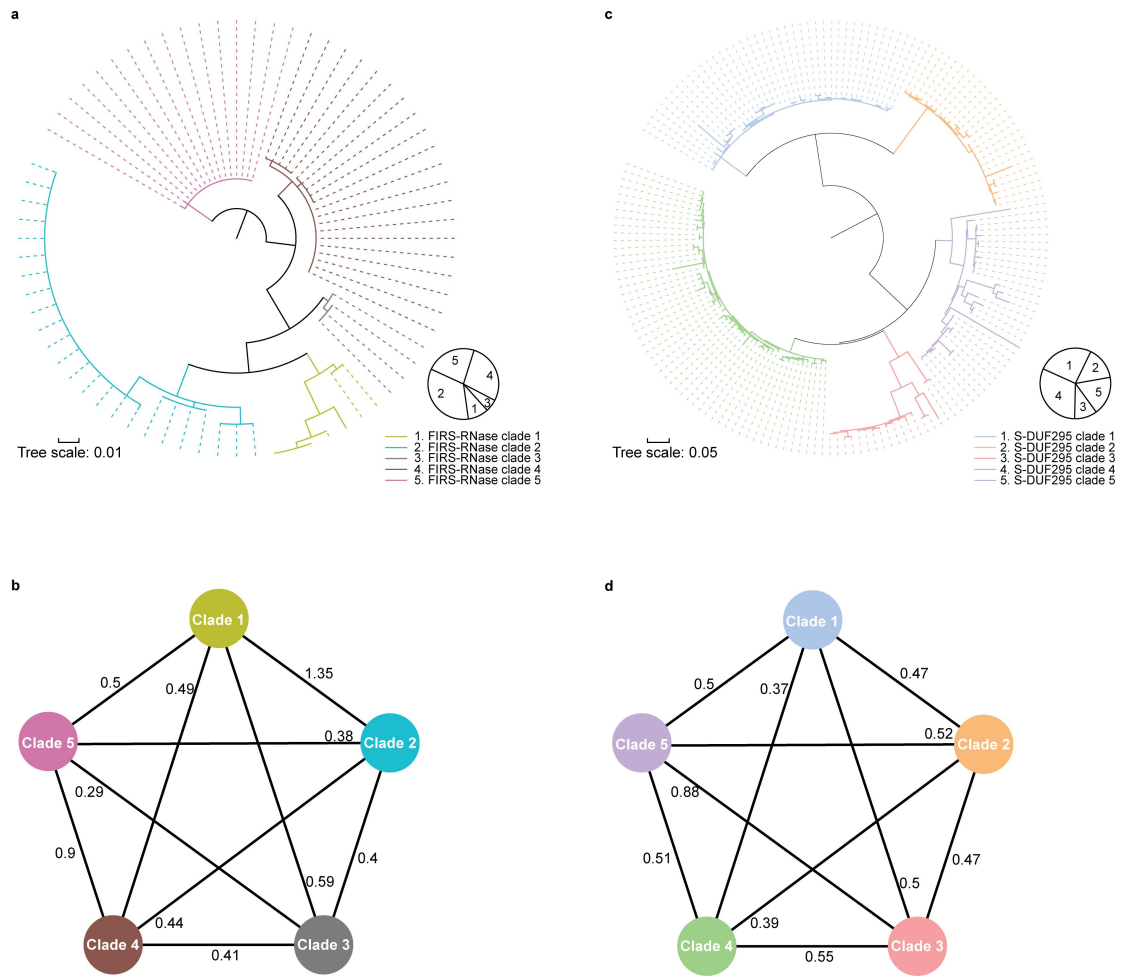

158

159 **Extended Data Fig. 19 | Phylogenetic relationships and  $Ka/Ks$  of *FIRS-RNase* and**

160 ***S-DUF295* genes. a**, Phylogenetic tree constructed based on *FIRS-RNase* protein

161 sequences. The five distinct clades are highlighted in different colors. **b**, The average

162 pairwise  $Ka/Ks$  values calculated between the different *FIRS-RNase* clades. **c**,

163 Phylogenetic tree of *S-DUF295* protein sequences, with the five main branches

164 distinguished by different colors. **d**, The average inter-clade  $Ka/Ks$  values for

165 *S-DUF295* clades.

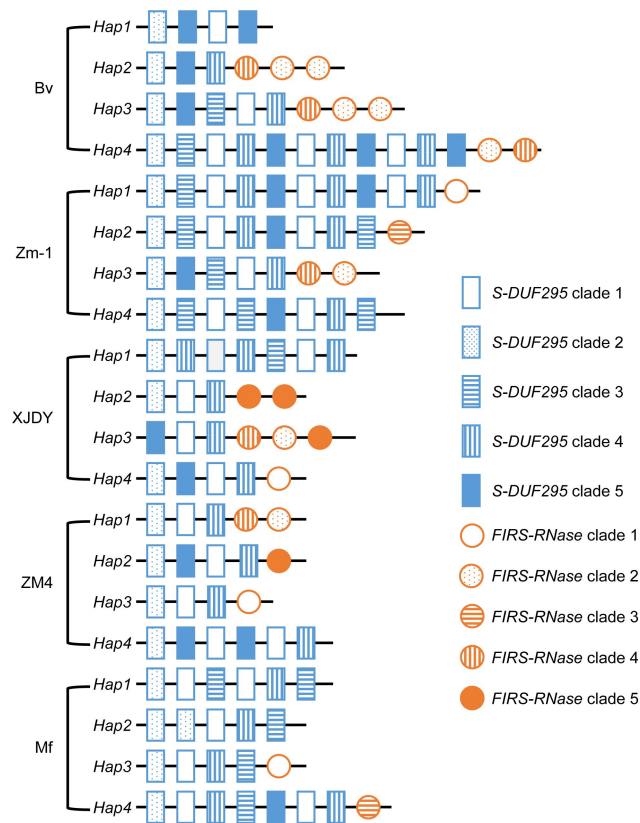

166

167 **Extended Data Fig. 20 | Gene composition of the *S*-locus across haplotypes from**  
 168 **five *M. sativa* accessions.** The *S*-locus regions from Chromosome 3 haplotypes of  
 169 *M. sativa* ssp. *sativa* Bolivia (Bv), Xinjiangdaye (XJDY), Zhongmu-1 (Zm-1),  
 170 Zhongmu-4 (ZM4), and *M. sativa* ssp. *falcata* are shown. Genes are color-coded by  
 171 type: *S-DUF295* (blue) and *FIRS-RNase* (orange). Within each gene type, distinct fill  
 172 patterns correspond to the five major phylogenetic clades identified in Extended Data  
 173 Figure 19.
